# Supplementary material
Source: MDPI journal article supplement (https://www.mdpi.com/2073-4395/11/11/2187)
Supplement: s1 [file s1]

Table S4. Morphotypes differentiated by cluster analysis, constituted by modern supposed wild populations and varieties whose area of cultivation and belonging to a gene pool according to genetic data [21, 54, 55] are presented.

| Morphotype / discrimination rate (%) | Pit shape                                                                                                                                               | Main area/Country of cultivation                                                                                                                                                                                                                       | Main use                                        | Inferred origin in the Mediterranean Basin (nuclear DNA markers)        | Maternal lineage of varieties (cpDNA haplotype)                    |
|--------------------------------------|---------------------------------------------------------------------------------------------------------------------------------------------------------|--------------------------------------------------------------------------------------------------------------------------------------------------------------------------------------------------------------------------------------------------------|-------------------------------------------------|-------------------------------------------------------------------------|--------------------------------------------------------------------|
| MT1 / 90.48                          | Round and rather symmetrical pits. Those of Arbequina are larger (size not measured in this study).                                                     | Supposed wild populations from various geographical origins and a Spanish variety (Arbequina) whose morphology is considered as primitive, i.e. close to the wild morphotype. "Arbequina" is discriminated from wild populations with a rate of 86.7%. | Oil for Arbequina                               | Central for Arbequina                                                   | -                                                                  |
| MT2 / 80.95                          | Slightly asymmetrical in lateral view with a rounded base and a slightly narrowed apex                                                                  | 4 varieties from Syria, France and Slovenia                                                                                                                                                                                                            | Table or mixed use                              | Eastern for varieties whose origin is known                             | Eastern for varieties whose origin is known                        |
| MT3 / 79.6                           | Tapered, elliptical, non-acuminate and slightly asymmetric pit in lateral view                                                                          | 1 supposed wild populations and varieties from mixed origin (Greece, Morocco, Spain and France)                                                                                                                                                        | The majority used to produce oil, except Semlal | Eastern (1) – Central (1)                                               | Eastern except Megaritiki and 2 varieties whose lineage is unknown |
| MT4 / 90.63                          | Slightly acuminate pit with relatively pronounced asymmetry in lateral view                                                                             | Varieties from various origins (Cyprus, Croatia, Morocco and France)                                                                                                                                                                                   | Oil or mixed use                                | Eastern (1) - Central (3)                                               | Eastern                                                            |
| MT5 / 88                             | Weakly acuminate and asymmetrical, essentially in lateral view                                                                                          | 2 varieties from the levantine region and 2 westerns (1 from Morocco and 1 from Spain)                                                                                                                                                                 | Various uses                                    | Mixed                                                                   | Eastern + 1 unknown lineage                                        |
| MT6 / 76.67                          | Weakly acuminate and asymmetrical, essentially in lateral view. Apical tip slightly more pronounced and the centre of gravity shifted towards the apex. | 1 supposed wild population and 7 varieties from various areas (Greece, Tunisia, Morocco (2), Spain (2 and France).                                                                                                                                     | Various uses                                    | Western (3), Central (1) or Admixed (1) varieties whose origin is known | Eastern                                                            |
| MT7 / 100                            | Very tapered and asymmetrical, especially in lateral view, with a centre of gravity located in the middle part or even slightly below.                  | 2 varieties from Lebanon and France                                                                                                                                                                                                                    | Oil and mixed use                               | Central or Admixed                                                      | Eastern for varieties whose lineage is known                       |

|              |                                                                                                                |                                                                                                                                                   |                                              |                                       |                                 |
|--------------|----------------------------------------------------------------------------------------------------------------|---------------------------------------------------------------------------------------------------------------------------------------------------|----------------------------------------------|---------------------------------------|---------------------------------|
| MT8 / 89.7   | Elliptical, slightly tapered, relatively symmetrical in dorsal view and asymmetrical in lateral view.          | Single variety from Greece                                                                                                                        | Table                                        | Unknown                               | Unknown                         |
| MT9 / 87.88  | Elliptical, slightly tapered, relatively symmetrical pits in dorsal view and asymmetrical pits in lateral view | 2 varieties from eastern Mediterranean (Syria and Greece) and 4 from western areas (Italy (2), Spain and Morocco)                                 | Various uses                                 | Central or admixed                    | Eastern                         |
| MT10 / 80.33 | Elliptical and slightly asymmetrical in lateral view                                                           | 3 supposed wild populations (Israel and Tunisia (2)), 4 Greek, 1 Croatian, 2 Tunisian and 1 Italian varieties.                                    | Various uses                                 | Admixed (4), Eastern (2), Central (1) | Eastern                         |
| MT11 / 74.6  | Elliptical, apex weakly acuminate, slightly asymmetrical in lateral view                                       | 3 supposed wild population (Israel and Morocco (2)), 1 from eastern mediterranea (Syria) and 5 from western areas (Italy (3), Tunisia and France. | For oil or mixed use (Besbessi and Aglandau) | Eastern (2), Admixed (3), Western (1) | Eastern except Cayon and Crastu |
| MT12 / 75.22 | Apex more pronounced, center of gravity located towards the base of the pit                                    | 1 supposed wild population and varieties mostly from Eastern areas (Levantine region (3), Cyprus (2 synonymous varieties) and France.             | Oil or mixed use                             | Eastern (5) or admixed                | Eastern except Olivière         |

---
