# Supplementary material
Source: MDPI journal article supplement (https://www.mdpi.com/2073-4395/11/11/2187)
Supplement: s1 [file s1]

Table S2. Studied cultivated varieties.

| Variety                        | ISEM-<br>Accession<br>number | Main use  | Supposed<br>origin | Inferred<br>origin by<br>nuclear DNA<br>markers† | Maternal<br>lineage<br>(cpDNA<br>haplotype)† | Location of sampling            | N  |
|--------------------------------|------------------------------|-----------|--------------------|--------------------------------------------------|----------------------------------------------|---------------------------------|----|
| Abou Chawkeh                   | 438                          | Oil/Table | Lebanon            | Central                                          | E2                                           | WOGB-Marrakech ‡                | 30 |
| Aglandau                       | 001                          | Oil/Table | France             | Admixed                                          | E1                                           | INRAE Melgueil, France          | 30 |
| Alethrico                      | 400                          | Oil       | Cyprus             | Eastern                                          | E1                                           | WOGB-Marrakech                  | 30 |
| Amfissa (or<br>Amfissis)       | 021                          | Oil/Table | Greece             | Eastern                                          | E1                                           | WOGB-Marrakech                  | 30 |
| Arbequina                      | 002                          | Oil       | Spain              | Central                                          | E1                                           | INRAE Melgueil, France          | 30 |
| Athalassa (syn.<br>Lefkara)    | 403                          | Oil       | Cyprus             | Eastern                                          | E1                                           | WOGB-Marrakech                  | 30 |
| Bella Dispagna                 | 271                          | Table     | Italy              | Western                                          | E1                                           | WOGB-Marrakech                  | 30 |
| Besbessi                       | 355                          | Oil/Table | Tunisia            | Eastern                                          | E1                                           | WOGB-Marrakech                  | 30 |
| Bouchouk                       | 729                          | Oil/Table | Morocco            | Admixed                                          | E1                                           | WOGB-Marrakech                  | 30 |
| Cailletier                     | 005                          | Oil/Table | France             | Central                                          | E1                                           | INRAE Melgueil, France          | 30 |
| Carasqueña                     | 339                          | Table     | Spain              | Western                                          | E1                                           | WOGB-Marrakech                  | 30 |
| Carolia (or<br>Karolia)        | 006                          | Table     | Greece             | Admixed                                          | E1                                           | INRAE Melgueil, France          | 30 |
| Cayet Roux                     | 007                          | Oil       | France             | Admixed                                          | E1                                           | INRAE Melgueil, France          | 30 |
| Cayon                          | 008                          | Oil       | France             | Admixed                                          | E2                                           | INRAE Melgueil, France          | 30 |
| Chemlali                       | 364                          | Oil       | Tunisia            | Admixed                                          | E1                                           | WOGB-Marrakech                  | 30 |
| Chondrolia (or<br>Chalkidikis) | 044                          | Oil/Table | Greece<br>(Crete)  | Admixed                                          | E1                                           | Ara-Chontrolia, Crete,<br>GR    | 30 |
| Cipressino (or<br>Frangivento) | 010                          | Oil       | Italy              | Unknown                                          | Unknown                                      | INRAE Melgueil, France          | 30 |
| Corniale                       | 009                          | Oil       | France             | Admixed                                          | E1                                           | INRAE Melgueil, France          | 30 |
| Crastu                         | 306                          | Oil       | Italy<br>(Sicily)  | Admixed                                          | E2                                           | WOGB-Marrakech                  | 30 |
| Djlot Shami                    | 445                          | Oil/Table | Syria              | Eastern                                          | E1                                           | WOGB-Marrakech                  | 27 |
| Drobnica                       | 348                          | Oil       | Croatia            | Central                                          | E1                                           | WOGB-Marrakech                  | 30 |
| Ecijano                        | 012                          | Oil       | Spain              | Unknown                                          | Unknown                                      | INRAE Melgueil, France          | 30 |
| Gaidouriola                    | 461                          | Table     | Greece             | Unknown                                          | Unknown                                      | Porquerolles collection,<br>CBN | 29 |
| Grappola                       | 462                          | Table     | Italy              | Central                                          | E1                                           | Porquerolles collection,<br>CBN | 30 |
| Grossane                       | 014                          | Oil       | France             | Admixed                                          | E1                                           | INRAE Melgueil, France          | 30 |
| Hamrani                        | 724                          | Oil/Table | Morocco            | Western                                          | E1                                           | WOGB-Marrakech                  | 30 |
| Istanbuli                      | 678                          | Oil/Table | Turkey/Sy<br>ria   | Unknown                                          | Unknown                                      | Idleb, Syria                    | 30 |
| Jlot Baladi                    | 675                          | Oil       | Syria              | Central                                          | E1                                           | Damascus, Syria                 | 30 |
| Kalamata (or<br>Kalamon)       | 015                          | Oil/Table | Greece             | Unknown                                          | Unknown                                      | INRAE Melgueil, France          | 30 |
| Koroneiki (syn.<br>Psilolia)   | 037                          | Oil       | Greece             | Admixed                                          | E1                                           | Nikos, Greece                   | 30 |
| Kortbi                         | 754                          | Oil/Table | Morocco            | Unknown                                          | Unknown                                      | Mwawej, Morocco                 | 29 |
| Lastovka                       | 349                          | Oil       | Croatia            | Admixed                                          | E1                                           | WOGB-Marrakech                  | 30 |

|                           |      |           |                |         |         |                              |    |
|---------------------------|------|-----------|----------------|---------|---------|------------------------------|----|
| Leccino                   | 016  | Oil       | Italy          | Admixed | E1      | WOGB-Marrakech               | 30 |
| Lefkara (syn. Athalassa)  | 408  | Oil       | Cyprus         | Eastern | E1      | WOGB-Marrakech               | 30 |
| Lentisca                  | 338  | Oil       | Spain          | Western | E1      | WOGB-Marrakech               | 30 |
| Manakiri                  | 038  | Oil       | Greece         | Eastern | E1      | Nikos, Greece                | 30 |
| Manzanilla de Jaen        | 017  | Oil/Table | Spain          | Western | E1      | INRAE Melgueil, France       | 30 |
| Mavrolia                  | 039  | Oil       | Greece         | Unknown | Unknown | Nikos, Greece                | 30 |
| Megaritiki                | 034  | Oil       | Greece         | Admixed | E2      | Desf Yanni, Greece           | 30 |
| Meski                     | 361  | Table     | Tunisia        | Eastern | E1      | WOGB-Marrakech               | 30 |
| Meslala                   | 378  | Oil/Table | Morocco        | Central | E1      | WOGB-Marrakech               | 30 |
| Mišnica                   | 335  | Table     | Slovenia       | Unknown | Unknown | WOGB-Marrakech               | 30 |
| Olivière                  | 022  | Oil       | France         | Admixed | E3      | INRAE Melgueil, France       | 30 |
| Picholine                 |      |           |                |         |         |                              |    |
| Marocaine (or Sigoise)    | 023  | Oil/Table | Morocco        | Western | E1      | INRAE Melgueil, France       | 30 |
| Picual                    | 024  | Oil       | Spain          | Western | E1      | INRAE Melgueil, France       | 30 |
| Psilolia (syn. Koroneiki) | 043  | Oil       | Greece (Crete) | Admixed | E1      | Neap-Psilolia, Greece        | 30 |
| Rkhami                    | 356  | Oil       | Tunisia        | Central | E1      | WOGB-Marrakech               | 30 |
| Semlal                    | 745  | Table     | Morocco        | Unknown | Unknown | Ghwiyba, Morocco             | 30 |
| Sourani (or Sorani)       | 666  | Oil/Table | Syria          | Eastern | E1      | WOGB-Marrakech               | 30 |
| Souri                     | 1040 | Oil/Table | Israel         | Eastern | E1      | Gilat (ARO), Israel          | 30 |
| Tanche                    | 471  | Oil/Table | France         | Eastern | E1      | Porquerolles collection, CBN | 29 |
| Tefahi (or Toffahi)       | 447  | Table     | Levantine area | Eastern | E1      | WOGB-Marrakech               | 30 |
| Verdale de l'Hérault      | 030  | Oil/Table | France         | Admixed | E1      | INRAE Melgueil, France       | 30 |
| Verdiel (or Empeltre)     | 382  | Oil       | Spain          | Central | E1      | WOGB-Marrakech               | 30 |
| Zaity (or Zaiti or Kurdi) | 664  | Oil/Table | Syria          | Eastern | E1      | WOGB-Marrakech               | 30 |

† after Besnard *et al.*, 2013 ; El Bakkali *et al.*, 2013 ; Khadari *et al.*, 2019

‡ Tessaout, INRA-Morocco
