# Supplementary material
Source: MDPI journal article supplement (https://www.mdpi.com/2073-4395/11/11/2187)
Supplement: s1 [file s1]

Table S1. Supposed wild olive (oleaster) populations.

| Population          | ISEM-<br>Accession<br>number | Country of sampling  | Geographic<br>Coordinates (Lat. / Long.) † | N  |
|---------------------|------------------------------|----------------------|--------------------------------------------|----|
| Aradena             | 045                          | Greece (Crete)       | 35.22519 / 24.06574                        | 20 |
| Atlit               | 1041-42                      | Israel               | 32.69288 / 34.94227                        | 20 |
| Bucakkişle          | 694                          | Turkey               | 37.04611 / 33.14833                        | 20 |
| Cabo de San Antonio | 805                          | Spain                | 38.80028 / 0.19139                         | 20 |
| Desfina             | 048                          | Greece (central)     | 38.411035 / 22.485482                      | 20 |
| Dor                 | 1045                         | Israel               | 32.62750 / 34.92528                        | 19 |
| Drasi               | 051                          | Greece (Crete)       | 35.215977 / 25.600632                      | 20 |
| Ile-Rousse          | 802                          | France (Corsica)     | -                                          | 20 |
| Jbel Zaghwan        | 801                          | Tunisia              | -                                          | 20 |
| Menzel Bourguiba    | 800                          | Tunisia              | -                                          | 20 |
| Mesmouda            | 197                          | Morocco              | 34.75036 / -5.73367                        | 20 |
| Moulay Bouazza      | 129                          | Morocco              | 33.16361 / -6.34107                        | 20 |
| Nahal Oren          | 1036-38                      | Israel               | 32. 713143 / 34.973294                     | 20 |
| Pylos               | 074                          | Greece (Peloponnese) | 36.920954 / 21.703741                      | 20 |
| Slunfeh             | 712                          | Syria                | 36.68944 / 36.73611                        | 20 |
| Tlata Taghram       | 215                          | Morocco              | 35.78889 / -5.46808                        | 20 |
| Viggianello         | 804                          | France (Corsica)     | 41.68444 / 8.95750                         | 20 |

† Coordinates of the centre point of the population.
