# Supplementary material
Source: MDPI journal article supplement (https://www.mdpi.com/2073-4395/11/11/2187)
Supplement: s1 [file s1]

Table S5. Geometrical parameters (*bi*) from morphometric analysis performed on archaeological pits from Hishuley Carmel site.

| <i>Dorsal view</i> |              |              |       |        |        |               |       |        |        |
|--------------------|--------------|--------------|-------|--------|--------|---------------|-------|--------|--------|
| Archaeological set | Olive number | Left outline |       |        |        | Right outline |       |        |        |
|                    |              | b0           | b1    | b2     | b3     | b0            | b1    | b2     | b3     |
| A                  | 1            | 0.206        | 0.137 | -0.314 | 0.044  | 0.235         | 0.163 | -0.390 | 0.001  |
| A                  | 2            | 0.223        | 0.126 | -0.356 | 0.043  | 0.278         | 0.178 | -0.478 | 0.037  |
| A                  | 3            | 0.216        | 0.130 | -0.325 | 0.062  | 0.242         | 0.181 | -0.391 | -0.007 |
| A                  | 4            | 0.259        | 0.123 | -0.470 | 0.073  | 0.297         | 0.191 | -0.543 | 0.017  |
| A                  | 5            | 0.238        | 0.113 | -0.433 | 0.071  | 0.283         | 0.225 | -0.497 | -0.047 |
| A                  | 6            | 0.262        | 0.113 | -0.445 | 0.093  | 0.274         | 0.192 | -0.469 | 0.017  |
| A                  | 7            | 0.190        | 0.110 | -0.280 | 0.065  | 0.238         | 0.183 | -0.381 | -0.012 |
| A                  | 9            | 0.210        | 0.153 | -0.329 | 0.017  | 0.337         | 0.190 | -0.595 | 0.035  |
| A                  | 10           | 0.222        | 0.149 | -0.359 | 0.021  | 0.259         | 0.152 | -0.430 | 0.058  |
| A                  | 12           | 0.183        | 0.118 | -0.271 | 0.041  | 0.288         | 0.148 | -0.524 | 0.041  |
| A                  | 13           | 0.194        | 0.167 | -0.303 | -0.006 | 0.255         | 0.154 | -0.434 | 0.033  |
| A                  | 15           | 0.169        | 0.114 | -0.252 | 0.032  | 0.204         | 0.121 | -0.306 | 0.054  |
| A                  | 16           | 0.258        | 0.141 | -0.443 | 0.057  | 0.314         | 0.174 | -0.584 | 0.049  |
| A                  | 18           | 0.195        | 0.075 | -0.283 | 0.093  | 0.248         | 0.173 | -0.410 | 0.011  |
| A                  | 20           | 0.190        | 0.175 | -0.292 | -0.025 | 0.275         | 0.159 | -0.475 | 0.046  |
| A                  | 23           | 0.246        | 0.123 | -0.421 | 0.054  | 0.352         | 0.235 | -0.621 | -0.008 |
| A                  | 25           | 0.193        | 0.099 | -0.300 | 0.034  | 0.269         | 0.156 | -0.487 | 0.039  |
| A                  | 26           | 0.237        | 0.115 | -0.388 | 0.070  | 0.264         | 0.176 | -0.454 | 0.026  |
| A                  | 29           | 0.200        | 0.126 | -0.317 | 0.037  | 0.219         | 0.158 | -0.372 | -0.004 |
| A                  | 31           | 0.226        | 0.180 | -0.355 | -0.015 | 0.278         | 0.129 | -0.492 | 0.089  |
| A                  | 32           | 0.224        | 0.156 | -0.367 | 0.022  | 0.236         | 0.137 | -0.367 | 0.052  |
| A                  | 33           | 0.219        | 0.152 | -0.354 | 0.004  | 0.244         | 0.125 | -0.416 | 0.071  |
| A                  | 35           | 0.232        | 0.136 | -0.361 | 0.041  | 0.281         | 0.172 | -0.487 | 0.042  |
| A                  | 36           | 0.226        | 0.150 | -0.357 | 0.013  | 0.281         | 0.104 | -0.499 | 0.059  |
| A                  | 37           | 0.207        | 0.147 | -0.332 | -0.003 | 0.298         | 0.151 | -0.579 | 0.052  |
| A                  | 38           | 0.214        | 0.123 | -0.316 | 0.055  | 0.219         | 0.171 | -0.340 | -0.008 |
| A                  | 39           | 0.278        | 0.169 | -0.473 | 0.038  | 0.279         | 0.171 | -0.479 | 0.047  |
| A                  | 40           | 0.224        | 0.158 | -0.371 | 0.006  | 0.252         | 0.148 | -0.441 | 0.038  |
| A                  | 41           | 0.191        | 0.131 | -0.299 | 0.022  | 0.210         | 0.106 | -0.359 | 0.052  |
| A                  | 42           | 0.251        | 0.156 | -0.429 | 0.034  | 0.309         | 0.184 | -0.548 | 0.039  |
| A                  | 43           | 0.225        | 0.118 | -0.425 | 0.029  | 0.257         | 0.171 | -0.457 | 0.013  |
| A                  | 44           | 0.229        | 0.162 | -0.375 | 0.017  | 0.250         | 0.137 | -0.426 | 0.057  |
| A                  | 45           | 0.239        | 0.149 | -0.386 | 0.043  | 0.316         | 0.199 | -0.552 | 0.045  |
| A                  | 46           | 0.202        | 0.108 | -0.327 | 0.019  | 0.284         | 0.156 | -0.506 | 0.076  |
| A                  | 47           | 0.127        | 0.083 | -0.157 | 0.055  | 0.241         | 0.180 | -0.390 | 0.001  |
| A                  | 48           | 0.278        | 0.161 | -0.468 | 0.051  | 0.289         | 0.181 | -0.499 | 0.033  |
| A                  | 49           | 0.243        | 0.155 | -0.423 | 0.033  | 0.268         | 0.171 | -0.475 | 0.030  |
| A                  | 51           | 0.234        | 0.175 | -0.365 | -0.001 | 0.282         | 0.171 | -0.483 | 0.035  |
| A                  | 52           | 0.228        | 0.188 | -0.369 | -0.017 | 0.269         | 0.137 | -0.468 | 0.090  |

|   |     |       |       |        |        |       |       |        |        |
|---|-----|-------|-------|--------|--------|-------|-------|--------|--------|
| A | 53  | 0.187 | 0.140 | -0.275 | 0.012  | 0.240 | 0.165 | -0.407 | 0.024  |
| A | 58  | 0.186 | 0.128 | -0.294 | 0.014  | 0.219 | 0.163 | -0.369 | 0.019  |
| A | 61  | 0.205 | 0.162 | -0.314 | 0.001  | 0.254 | 0.118 | -0.439 | 0.093  |
| A | 65  | 0.233 | 0.155 | -0.391 | 0.042  | 0.262 | 0.151 | -0.465 | 0.023  |
| A | 66  | 0.220 | 0.126 | -0.321 | 0.055  | 0.282 | 0.155 | -0.498 | 0.057  |
| A | 68  | 0.220 | 0.128 | -0.308 | 0.064  | 0.231 | 0.159 | -0.360 | 0.018  |
| A | 70  | 0.177 | 0.104 | -0.252 | 0.061  | 0.285 | 0.224 | -0.480 | -0.027 |
| A | 72  | 0.173 | 0.070 | -0.263 | 0.056  | 0.241 | 0.196 | -0.389 | -0.013 |
| A | 73  | 0.187 | 0.112 | -0.295 | 0.057  | 0.259 | 0.182 | -0.440 | -0.004 |
| A | 75  | 0.259 | 0.164 | -0.476 | 0.044  | 0.266 | 0.140 | -0.471 | 0.072  |
| A | 76  | 0.211 | 0.149 | -0.334 | 0.031  | 0.260 | 0.186 | -0.453 | 0.002  |
| A | 77  | 0.209 | 0.120 | -0.314 | 0.066  | 0.284 | 0.204 | -0.493 | -0.006 |
| A | 78  | 0.248 | 0.155 | -0.390 | 0.036  | 0.292 | 0.185 | -0.499 | 0.029  |
| A | 79  | 0.217 | 0.165 | -0.343 | -0.006 | 0.234 | 0.127 | -0.377 | 0.054  |
| A | 80  | 0.217 | 0.131 | -0.346 | 0.039  | 0.250 | 0.156 | -0.439 | 0.024  |
| A | 81  | 0.167 | 0.096 | -0.229 | 0.062  | 0.292 | 0.209 | -0.510 | -0.001 |
| A | 82  | 0.165 | 0.049 | -0.225 | 0.107  | 0.273 | 0.163 | -0.470 | 0.054  |
| A | 83  | 0.206 | 0.151 | -0.312 | 0.018  | 0.253 | 0.135 | -0.431 | 0.060  |
| A | 84  | 0.255 | 0.155 | -0.442 | 0.0476 | 0.297 | 0.207 | -0.532 | 0.002  |
| A | 85  | 0.208 | 0.159 | -0.317 | 0.014  | 0.273 | 0.169 | -0.468 | 0.031  |
| A | 87  | 0.243 | 0.198 | -0.403 | 0.001  | 0.256 | 0.157 | -0.436 | 0.036  |
| A | 88  | 0.265 | 0.159 | -0.466 | 0.038  | 0.265 | 0.167 | -0.464 | 0.036  |
| A | 89  | 0.196 | 0.160 | -0.303 | 0.015  | 0.236 | 0.160 | -0.380 | 0.015  |
| A | 90  | 0.214 | 0.093 | -0.373 | 0.050  | 0.267 | 0.182 | -0.462 | 0.009  |
| A | 93  | 0.269 | 0.147 | -0.477 | 0.055  | 0.299 | 0.149 | -0.540 | 0.078  |
| A | 94  | 0.245 | 0.154 | -0.430 | 0.035  | 0.263 | 0.177 | -0.447 | 0.016  |
| A | 96  | 0.210 | 0.109 | -0.329 | 0.062  | 0.285 | 0.208 | -0.496 | -0.008 |
| A | 98  | 0.209 | 0.133 | -0.326 | 0.054  | 0.283 | 0.184 | -0.453 | 0.038  |
| A | 100 | 0.201 | 0.156 | -0.293 | 0.010  | 0.214 | 0.120 | -0.342 | 0.059  |
| A | 103 | 0.262 | 0.178 | -0.452 | 0.019  | 0.318 | 0.201 | -0.581 | 0.022  |
| A | 104 | 0.236 | 0.161 | -0.382 | 0.021  | 0.245 | 0.123 | -0.424 | 0.068  |
| A | 105 | 0.260 | 0.141 | -0.436 | 0.060  | 0.291 | 0.168 | -0.498 | 0.031  |
| A | 108 | 0.231 | 0.155 | -0.361 | 0.035  | 0.251 | 0.164 | -0.405 | 0.023  |
| A | 109 | 0.265 | 0.169 | -0.446 | 0.032  | 0.281 | 0.153 | -0.485 | 0.067  |
| A | 110 | 0.239 | 0.110 | -0.409 | 0.070  | 0.279 | 0.181 | -0.491 | 0.009  |
| A | 111 | 0.265 | 0.200 | -0.464 | -0.011 | 0.269 | 0.129 | -0.488 | 0.076  |
| A | 112 | 0.196 | 0.143 | -0.302 | 0.006  | 0.259 | 0.149 | -0.465 | 0.055  |
| A | 113 | 0.273 | 0.126 | -0.525 | 0.028  | 0.292 | 0.164 | -0.520 | 0.058  |
| A | 114 | 0.225 | 0.138 | -0.346 | 0.041  | 0.254 | 0.165 | -0.432 | 0.029  |
| A | 115 | 0.218 | 0.156 | -0.343 | 0.022  | 0.239 | 0.125 | -0.400 | 0.061  |
| A | 117 | 0.214 | 0.154 | -0.334 | 0.007  | 0.258 | 0.163 | -0.438 | 0.034  |
| A | 124 | 0.258 | 0.144 | -0.451 | 0.055  | 0.271 | 0.192 | -0.480 | 0.007  |
| A | 125 | 0.197 | 0.167 | -0.296 | 0.003  | 0.204 | 0.151 | -0.300 | 0.011  |
| A | 126 | 0.199 | 0.110 | -0.326 | 0.047  | 0.303 | 0.187 | -0.567 | 0.033  |
| A | 127 | 0.204 | 0.097 | -0.347 | 0.027  | 0.265 | 0.183 | -0.431 | -0.001 |
| A | 129 | 0.200 | 0.104 | -0.340 | 0.059  | 0.276 | 0.206 | -0.486 | -0.003 |

|   |     |       |       |        |        |       |       |        |        |
|---|-----|-------|-------|--------|--------|-------|-------|--------|--------|
| A | 130 | 0.195 | 0.118 | -0.313 | 0.033  | 0.213 | 0.112 | -0.366 | 0.066  |
| A | 131 | 0.249 | 0.138 | -0.409 | 0.055  | 0.260 | 0.164 | -0.434 | 0.043  |
| A | 132 | 0.283 | 0.140 | -0.503 | 0.098  | 0.293 | 0.177 | -0.554 | 0.036  |
| A | 134 | 0.241 | 0.182 | -0.396 | -0.006 | 0.261 | 0.146 | -0.449 | 0.052  |
| A | 136 | 0.233 | 0.125 | -0.388 | 0.040  | 0.283 | 0.166 | -0.510 | 0.028  |
| A | 137 | 0.240 | 0.156 | -0.412 | 0.034  | 0.283 | 0.148 | -0.503 | 0.065  |
| A | 139 | 0.209 | 0.137 | -0.313 | 0.019  | 0.246 | 0.170 | -0.430 | 0.011  |
| A | 140 | 0.258 | 0.172 | -0.449 | -0.004 | 0.310 | 0.174 | -0.548 | 0.047  |
| A | 146 | 0.187 | 0.105 | -0.273 | 0.035  | 0.263 | 0.157 | -0.443 | 0.046  |
| A | 147 | 0.251 | 0.162 | -0.417 | 0.023  | 0.261 | 0.166 | -0.446 | 0.032  |
| A | 148 | 0.260 | 0.167 | -0.454 | 0.031  | 0.285 | 0.173 | -0.487 | 0.026  |
| A | 150 | 0.252 | 0.135 | -0.427 | 0.068  | 0.296 | 0.160 | -0.534 | 0.067  |
| A | 152 | 0.288 | 0.180 | -0.499 | 0.035  | 0.291 | 0.162 | -0.505 | 0.055  |
| A | 153 | 0.247 | 0.196 | -0.426 | -0.011 | 0.286 | 0.144 | -0.526 | 0.085  |
| B | 1   | 0.214 | 0.145 | -0.325 | 0.022  | 0.255 | 0.154 | -0.416 | 0.034  |
| B | 2   | 0.247 | 0.175 | -0.436 | -0.006 | 0.291 | 0.194 | -0.536 | 0.001  |
| B | 3   | 0.292 | 0.194 | -0.543 | 0.028  | 0.298 | 0.162 | -0.539 | 0.075  |
| B | 5   | 0.225 | 0.174 | -0.373 | -0.004 | 0.235 | 0.117 | -0.393 | 0.067  |
| B | 6   | 0.185 | 0.106 | -0.273 | 0.056  | 0.246 | 0.190 | -0.412 | -0.005 |
| B | 7   | 0.249 | 0.157 | -0.447 | 0.028  | 0.289 | 0.183 | -0.521 | 0.013  |
| B | 8   | 0.277 | 0.135 | -0.523 | 0.077  | 0.333 | 0.222 | -0.619 | 0.013  |
| B | 10  | 0.227 | 0.143 | -0.370 | 0.034  | 0.266 | 0.148 | -0.474 | 0.074  |
| B | 11  | 0.202 | 0.114 | -0.319 | 0.030  | 0.317 | 0.174 | -0.616 | 0.069  |
| B | 12  | 0.297 | 0.146 | -0.544 | 0.088  | 0.330 | 0.194 | -0.639 | 0.031  |
| B | 13  | 0.192 | 0.140 | -0.296 | 0.006  | 0.247 | 0.150 | -0.437 | 0.027  |
| B | 17  | 0.170 | 0.118 | -0.229 | 0.032  | 0.190 | 0.164 | -0.273 | -0.001 |
| B | 18  | 0.238 | 0.144 | -0.395 | 0.041  | 0.290 | 0.173 | -0.520 | 0.041  |
| B | 19  | 0.241 | 0.176 | -0.409 | -0.006 | 0.289 | 0.168 | -0.492 | 0.061  |
| B | 20  | 0.250 | 0.148 | -0.415 | 0.029  | 0.274 | 0.165 | -0.511 | 0.023  |
| B | 22  | 0.201 | 0.168 | -0.319 | 0.004  | 0.215 | 0.055 | -0.369 | 0.010  |
| B | 24  | 0.174 | 0.141 | -0.262 | 0.007  | 0.304 | 0.167 | -0.546 | 0.060  |
| B | 27  | 0.204 | 0.179 | -0.310 | -0.019 | 0.252 | 0.126 | -0.434 | 0.084  |
| B | 28  | 0.243 | 0.159 | -0.394 | 0.033  | 0.263 | 0.170 | -0.431 | 0.030  |
| B | 30  | 0.244 | 0.168 | -0.426 | 0.017  | 0.295 | 0.150 | -0.546 | 0.079  |
| B | 31  | 0.203 | 0.125 | -0.335 | 0.006  | 0.243 | 0.150 | -0.420 | 0.032  |
| B | 32  | 0.232 | 0.161 | -0.376 | 0.016  | 0.233 | 0.137 | -0.380 | 0.054  |
| B | 34  | 0.184 | 0.036 | -0.313 | 0.057  | 0.257 | 0.214 | -0.452 | 0.027  |
| B | 36  | 0.223 | 0.159 | -0.369 | -0.002 | 0.251 | 0.133 | -0.451 | 0.045  |
| B | 37  | 0.257 | 0.203 | -0.407 | -0.026 | 0.263 | 0.152 | -0.444 | 0.052  |
| B | 39  | 0.245 | 0.120 | -0.439 | 0.056  | 0.318 | 0.195 | -0.602 | 0.026  |
| B | 41  | 0.260 | 0.193 | -0.464 | -0.009 | 0.269 | 0.151 | -0.504 | 0.047  |
| B | 43  | 0.206 | 0.154 | -0.326 | 0.022  | 0.298 | 0.178 | -0.531 | 0.039  |
| B | 44  | 0.180 | 0.101 | -0.274 | 0.033  | 0.218 | 0.181 | -0.361 | -0.009 |
| B | 45  | 0.213 | 0.160 | -0.306 | 0.003  | 0.273 | 0.176 | -0.472 | 0.023  |
| B | 46  | 0.185 | 0.100 | -0.273 | 0.061  | 0.297 | 0.194 | -0.515 | 0.018  |
| B | 47  | 0.260 | 0.174 | -0.453 | 0.030  | 0.321 | 0.196 | -0.580 | 0.013  |

|   |     |        |       |        |        |       |       |        |        |
|---|-----|--------|-------|--------|--------|-------|-------|--------|--------|
| B | 48  | 0.290  | 0.142 | -0.519 | 0.092  | 0.309 | 0.142 | -0.554 | 0.069  |
| B | 49  | 0.250  | 0.150 | -0.449 | 0.044  | 0.275 | 0.134 | -0.518 | 0.065  |
| B | 50  | 0.231  | 0.118 | -0.400 | 0.044  | 0.283 | 0.194 | -0.501 | -0.004 |
| B | 51  | 0.171  | 0.123 | -0.251 | 0.050  | 0.261 | 0.162 | -0.461 | 0.031  |
| B | 52  | 0.212  | 0.130 | -0.345 | 0.034  | 0.250 | 0.172 | -0.439 | 0.010  |
| B | 53  | 0.234  | 0.135 | -0.408 | 0.040  | 0.251 | 0.146 | -0.437 | 0.049  |
| B | 56  | 0.216  | 0.156 | -0.341 | 0.024  | 0.262 | 0.153 | -0.456 | 0.044  |
| B | 57  | 0.276  | 0.170 | -0.499 | 0.010  | 0.296 | 0.162 | -0.561 | 0.038  |
| B | 60  | 0.216  | 0.113 | -0.361 | 0.039  | 0.219 | 0.142 | -0.328 | 0.034  |
| B | 62  | 0.214  | 0.178 | -0.351 | -0.016 | 0.291 | 0.132 | -0.529 | 0.063  |
| B | 63  | 0.216  | 0.135 | -0.348 | 0.040  | 0.249 | 0.141 | -0.433 | 0.049  |
| B | 65  | 0.229  | 0.110 | -0.371 | 0.085  | 0.267 | 0.177 | -0.445 | 0.028  |
| B | 67  | 0.187  | 0.106 | -0.298 | 0.061  | 0.269 | 0.177 | -0.473 | 0.014  |
| B | 68  | 0.190  | 0.111 | -0.277 | 0.046  | 0.233 | 0.168 | -0.376 | 0.017  |
| B | 71  | 0.186  | 0.151 | -0.278 | 0.018  | 0.278 | 0.155 | -0.513 | 0.068  |
| B | 72  | 0.181  | 0.105 | -0.261 | 0.056  | 0.262 | 0.207 | -0.441 | -0.015 |
| B | 73  | 0.207  | 0.143 | -0.338 | 0.014  | 0.288 | 0.196 | -0.486 | 0.024  |
| B | 75  | 0.199  | 0.164 | -0.285 | 0.006  | 0.278 | 0.151 | -0.481 | 0.053  |
| B | 78  | 0.164  | 0.120 | -0.251 | 0.034  | 0.227 | 0.163 | -0.391 | -0.002 |
| B | 79  | 0.240  | 0.151 | -0.389 | 0.041  | 0.281 | 0.189 | -0.491 | 0.008  |
| B | 80  | 0.207  | 0.126 | -0.342 | 0.019  | 0.238 | 0.157 | -0.418 | 0.029  |
| B | 81  | 0.243  | 0.178 | -0.413 | 0.009  | 0.243 | 0.123 | -0.407 | 0.060  |
| B | 82  | 0.242  | 0.143 | -0.419 | 0.038  | 0.249 | 0.168 | -0.424 | 0.018  |
| B | 84  | 0.210  | 0.126 | -0.325 | 0.048  | 0.277 | 0.174 | -0.489 | 0.030  |
| B | 85  | 0.184  | 0.078 | -0.290 | 0.061  | 0.230 | 0.188 | -0.379 | -0.012 |
| B | 86  | 0.257  | 0.121 | -0.486 | 0.055  | 0.260 | 0.174 | -0.480 | 0.005  |
| B | 87  | 0.2683 | 0.208 | -0.482 | -0.017 | 0.288 | 0.157 | -0.526 | 0.064  |
| B | 89  | 0.243  | 0.155 | -0.396 | 0.035  | 0.280 | 0.193 | -0.486 | 0.010  |
| B | 90  | 0.201  | 0.105 | -0.325 | 0.042  | 0.244 | 0.154 | -0.413 | 0.046  |
| B | 91  | 0.195  | 0.110 | -0.303 | 0.036  | 0.268 | 0.131 | -0.481 | 0.061  |
| B | 92  | 0.235  | 0.180 | -0.384 | -0.008 | 0.270 | 0.134 | -0.459 | 0.084  |
| B | 93  | 0.288  | 0.140 | -0.522 | 0.063  | 0.296 | 0.181 | -0.553 | 0.034  |
| B | 94  | 0.224  | 0.152 | -0.374 | 0.022  | 0.246 | 0.160 | -0.405 | 0.020  |
| B | 95  | 0.260  | 0.111 | -0.452 | 0.105  | 0.263 | 0.176 | -0.457 | 0.004  |
| B | 96  | 0.219  | 0.167 | -0.334 | 0.005  | 0.272 | 0.173 | -0.474 | 0.019  |
| B | 97  | 0.290  | 0.175 | -0.528 | 0.049  | 0.318 | 0.194 | -0.553 | 0.030  |
| B | 98  | 0.218  | 0.109 | -0.362 | 0.070  | 0.227 | 0.159 | -0.381 | 0.023  |
| B | 99  | 0.209  | 0.123 | -0.353 | 0.013  | 0.260 | 0.190 | -0.457 | 0.014  |
| B | 100 | 0.282  | 0.183 | -0.501 | 0.047  | 0.348 | 0.188 | -0.640 | 0.080  |
| B | 101 | 0.172  | 0.106 | -0.244 | 0.014  | 0.287 | 0.158 | -0.508 | 0.071  |
| B | 102 | 0.287  | 0.185 | -0.519 | 0.016  | 0.300 | 0.139 | -0.570 | 0.075  |
| B | 103 | 0.241  | 0.153 | -0.426 | 0.020  | 0.302 | 0.156 | -0.533 | 0.072  |
| B | 104 | 0.258  | 0.143 | -0.441 | 0.044  | 0.270 | 0.202 | -0.464 | -0.013 |
| B | 105 | 0.170  | 0.121 | -0.261 | 0.038  | 0.187 | 0.118 | -0.297 | 0.027  |
| B | 106 | 0.215  | 0.156 | -0.315 | 0.022  | 0.224 | 0.154 | -0.357 | 0.015  |
| B | 107 | 0.236  | 0.133 | -0.387 | 0.029  | 0.298 | 0.172 | -0.534 | 0.042  |

|   |     |       |       |        |        |       |       |        |        |
|---|-----|-------|-------|--------|--------|-------|-------|--------|--------|
| B | 108 | 0.188 | 0.129 | -0.275 | 0.030  | 0.204 | 0.150 | -0.306 | 0.012  |
| B | 109 | 0.180 | 0.192 | -0.242 | -0.045 | 0.251 | 0.116 | -0.453 | 0.067  |
| B | 110 | 0.226 | 0.186 | -0.382 | -0.010 | 0.296 | 0.159 | -0.549 | 0.054  |
| B | 111 | 0.229 | 0.153 | -0.364 | 0.026  | 0.254 | 0.152 | -0.442 | 0.045  |
| B | 112 | 0.208 | 0.102 | -0.322 | 0.086  | 0.240 | 0.190 | -0.378 | -0.013 |
| B | 113 | 0.253 | 0.158 | -0.437 | 0.039  | 0.255 | 0.150 | -0.425 | 0.062  |
| B | 114 | 0.211 | 0.143 | -0.337 | 0.015  | 0.244 | 0.144 | -0.416 | 0.040  |
| B | 115 | 0.222 | 0.136 | -0.352 | 0.052  | 0.279 | 0.193 | -0.485 | -0.000 |
| B | 116 | 0.256 | 0.150 | -0.451 | 0.060  | 0.266 | 0.167 | -0.432 | 0.008  |
| B | 117 | 0.221 | 0.118 | -0.350 | 0.061  | 0.253 | 0.194 | -0.426 | -0.010 |
| B | 118 | 0.223 | 0.167 | -0.344 | -0.001 | 0.256 | 0.145 | -0.439 | 0.052  |
| B | 119 | 0.302 | 0.193 | -0.556 | 0.031  | 0.310 | 0.203 | -0.578 | 0.017  |
| B | 120 | 0.254 | 0.137 | -0.455 | 0.065  | 0.262 | 0.179 | -0.444 | 0.019  |
| B | 121 | 0.236 | 0.150 | -0.394 | 0.009  | 0.272 | 0.141 | -0.484 | 0.079  |
| B | 122 | 0.197 | 0.184 | -0.301 | -0.019 | 0.255 | 0.177 | -0.437 | -0.005 |
| B | 123 | 0.212 | 0.136 | -0.351 | 0.047  | 0.275 | 0.165 | -0.492 | 0.006  |
| B | 124 | 0.243 | 0.147 | -0.406 | 0.038  | 0.285 | 0.177 | -0.515 | 0.026  |
| B | 125 | 0.144 | 0.080 | -0.202 | 0.053  | 0.244 | 0.174 | -0.416 | 0.007  |
| B | 126 | 0.212 | 0.169 | -0.328 | -0.008 | 0.266 | 0.138 | -0.457 | 0.072  |
| B | 127 | 0.218 | 0.165 | -0.353 | 0.014  | 0.233 | 0.159 | -0.365 | 0.028  |
| B | 128 | 0.206 | 0.185 | -0.312 | -0.026 | 0.280 | 0.152 | -0.489 | 0.065  |
| B | 129 | 0.230 | 0.116 | -0.382 | 0.062  | 0.255 | 0.169 | -0.447 | 0.017  |
| B | 130 | 0.268 | 0.167 | -0.481 | 0.021  | 0.299 | 0.183 | -0.553 | 0.024  |
| B | 131 | 0.271 | 0.141 | -0.506 | 0.076  | 0.290 | 0.192 | -0.504 | 0.011  |
| B | 132 | 0.216 | 0.154 | -0.325 | 0.023  | 0.235 | 0.145 | -0.366 | 0.050  |
| B | 133 | 0.169 | 0.105 | -0.243 | 0.042  | 0.231 | 0.184 | -0.370 | -0.003 |
| B | 134 | 0.244 | 0.184 | -0.419 | -0.005 | 0.245 | 0.098 | -0.411 | 0.114  |
| B | 135 | 0.245 | 0.074 | -0.404 | 0.111  | 0.252 | 0.227 | -0.409 | -0.058 |
| B | 136 | 0.198 | 0.119 | -0.296 | 0.049  | 0.270 | 0.202 | -0.473 | -0.014 |
| B | 137 | 0.223 | 0.160 | -0.361 | 0.014  | 0.278 | 0.169 | -0.493 | 0.039  |
| B | 138 | 0.184 | 0.076 | -0.300 | 0.036  | 0.266 | 0.176 | -0.464 | 0.022  |
| B | 139 | 0.189 | 0.113 | -0.288 | 0.030  | 0.256 | 0.136 | -0.436 | 0.059  |
| B | 140 | 0.222 | 0.091 | -0.384 | 0.082  | 0.273 | 0.191 | -0.511 | 0.001  |
| B | 141 | 0.276 | 0.176 | -0.520 | 0.011  | 0.294 | 0.181 | -0.543 | 0.041  |
| B | 142 | 0.180 | 0.083 | -0.270 | 0.080  | 0.235 | 0.187 | -0.390 | -0.025 |
| B | 143 | 0.242 | 0.176 | -0.398 | 0.010  | 0.273 | 0.152 | -0.460 | 0.050  |
| B | 144 | 0.149 | 0.070 | -0.167 | 0.070  | 0.20  | 0.153 | -0.319 | 0.001  |
| B | 145 | 0.210 | 0.177 | -0.319 | -0.012 | 0.270 | 0.144 | -0.480 | 0.064  |
| B | 146 | 0.189 | 0.069 | -0.289 | 0.101  | 0.234 | 0.171 | -0.380 | 0.033  |
| B | 147 | 0.128 | 0.149 | -0.165 | -0.003 | 0.239 | 0.175 | -0.405 | 0.002  |
| B | 148 | 0.233 | 0.142 | -0.348 | 0.036  | 0.267 | 0.163 | -0.459 | 0.046  |
| B | 149 | 0.238 | 0.159 | -0.388 | 0.030  | 0.265 | 0.158 | -0.442 | 0.043  |
| B | 150 | 0.215 | 0.138 | -0.339 | 0.060  | 0.306 | 0.226 | -0.522 | -0.016 |
| B | 151 | 0.206 | 0.110 | -0.322 | 0.057  | 0.262 | 0.170 | -0.457 | 0.023  |
| B | 152 | 0.243 | 0.126 | -0.431 | 0.022  | 0.296 | 0.189 | -0.536 | 0.014  |
| B | 153 | 0.203 | 0.103 | -0.310 | 0.067  | 0.278 | 0.197 | -0.454 | -0.003 |

|   |     |       |       |        |        |       |       |        |       |
|---|-----|-------|-------|--------|--------|-------|-------|--------|-------|
| B | 154 | 0.232 | 0.133 | -0.374 | 0.042  | 0.246 | 0.155 | -0.422 | 0.026 |
| B | 155 | 0.151 | 0.110 | -0.227 | -0.007 | 0.230 | 0.152 | -0.395 | 0.040 |
| B | 156 | 0.202 | 0.136 | -0.329 | 0.032  | 0.261 | 0.170 | -0.453 | 0.017 |
| B | 157 | 0.202 | 0.168 | -0.278 | -0.007 | 0.216 | 0.131 | -0.339 | 0.030 |
| B | 158 | 0.204 | 0.132 | -0.329 | 0.007  | 0.252 | 0.139 | -0.443 | 0.051 |
| B | 159 | 0.152 | 0.163 | -0.187 | -0.025 | 0.204 | 0.108 | -0.334 | 0.050 |
| B | 160 | 0.209 | 0.165 | -0.346 | 0.005  | 0.297 | 0.169 | -0.531 | 0.027 |
| B | 161 | 0.223 | 0.160 | -0.365 | 0.005  | 0.274 | 0.162 | -0.471 | 0.042 |
| B | 162 | 0.160 | 0.111 | -0.229 | -0.001 | 0.252 | 0.163 | -0.446 | 0.013 |
| B | 163 | 0.175 | 0.106 | -0.259 | 0.052  | 0.217 | 0.160 | -0.347 | 0.003 |
| B | 164 | 0.196 | 0.144 | -0.281 | 0.023  | 0.227 | 0.147 | -0.372 | 0.005 |
| B | 165 | 0.173 | 0.114 | -0.242 | 0.049  | 0.250 | 0.180 | -0.407 | 0.007 |
| B | 166 | 0.253 | 0.174 | -0.443 | 0.016  | 0.287 | 0.185 | -0.495 | 0.033 |
| B | 167 | 0.212 | 0.176 | -0.328 | 0.001  | 0.217 | 0.093 | -0.357 | 0.079 |
| B | 168 | 0.182 | 0.156 | -0.258 | -0.001 | 0.193 | 0.106 | -0.283 | 0.052 |
| B | 169 | 0.184 | 0.110 | -0.293 | 0.008  | 0.279 | 0.167 | -0.492 | 0.048 |
| B | 170 | 0.176 | 0.110 | -0.231 | 0.061  | 0.285 | 0.187 | -0.477 | 0.009 |
| B | 171 | 0.196 | 0.122 | -0.312 | 0.014  | 0.214 | 0.118 | -0.337 | 0.063 |
| B | 172 | 0.158 | 0.101 | -0.221 | 0.042  | 0.216 | 0.117 | -0.363 | 0.029 |
| B | 173 | 0.212 | 0.175 | -0.313 | -0.00  | 0.219 | 0.114 | -0.367 | 0.053 |
| B | 174 | 0.252 | 0.186 | -0.427 | -0.013 | 0.286 | 0.160 | -0.480 | 0.040 |
| B | 175 | 0.136 | 0.114 | -0.197 | -0.017 | 0.254 | 0.127 | -0.449 | 0.082 |
| B | 176 | 0.208 | 0.120 | -0.321 | 0.059  | 0.217 | 0.157 | -0.329 | 0.010 |
| B | 177 | 0.106 | 0.175 | -0.107 | -0.053 | 0.255 | 0.121 | -0.449 | 0.081 |

*Lateral view*

| Archaeological set | Olive number | Sterile valve outline |       |        |        | Fertile valve outline |       |        |       |
|--------------------|--------------|-----------------------|-------|--------|--------|-----------------------|-------|--------|-------|
|                    |              | b0                    | b1    | b2     | b3     | b0                    | b1    | b2     | b3    |
| A                  | 1            | 0.210                 | 0.157 | -0.322 | 0.010  | 0.243                 | 0.175 | -0.407 | 0.012 |
| A                  | 2            | 0.213                 | 0.084 | -0.370 | 0.060  | 0.289                 | 0.177 | -0.513 | 0.032 |
| A                  | 3            | 0.205                 | 0.146 | -0.298 | 0.014  | 0.220                 | 0.157 | -0.315 | 0.025 |
| A                  | 4            | 0.239                 | 0.118 | -0.423 | 0.060  | 0.304                 | 0.193 | -0.573 | 0.013 |
| A                  | 5            | 0.255                 | 0.177 | -0.422 | 0.024  | 0.260                 | 0.136 | -0.443 | 0.064 |
| A                  | 6            | 0.218                 | 0.092 | -0.375 | 0.063  | 0.299                 | 0.198 | -0.536 | 0.002 |
| A                  | 7            | 0.137                 | 0.057 | -0.202 | 0.015  | 0.275                 | 0.144 | -0.467 | 0.060 |
| A                  | 9            | 0.258                 | 0.171 | -0.443 | 0.016  | 0.285                 | 0.156 | -0.511 | 0.060 |
| A                  | 10           | 0.212                 | 0.124 | -0.347 | 0.042  | 0.262                 | 0.171 | -0.430 | 0.017 |
| A                  | 12           | 0.248                 | 0.158 | -0.437 | 0.026  | 0.260                 | 0.155 | -0.452 | 0.046 |
| A                  | 13           | 0.201                 | 0.138 | -0.314 | 0.026  | 0.245                 | 0.152 | -0.435 | 0.042 |
| A                  | 15           | 0.117                 | 0.065 | -0.137 | 0.033  | 0.224                 | 0.122 | -0.359 | 0.060 |
| A                  | 16           | 0.211                 | 0.132 | -0.352 | 0.049  | 0.333                 | 0.209 | -0.592 | 0.035 |
| A                  | 18           | 0.180                 | 0.161 | -0.264 | -0.015 | 0.261                 | 0.137 | -0.438 | 0.067 |
| A                  | 20           | 0.215                 | 0.143 | -0.343 | 0.016  | 0.227                 | 0.138 | -0.386 | 0.043 |
| A                  | 23           | 0.216                 | 0.149 | -0.381 | 0.006  | 0.327                 | 0.174 | -0.612 | 0.069 |
| A                  | 25           | 0.205                 | 0.098 | -0.352 | 0.039  | 0.253                 | 0.162 | -0.443 | 0.025 |

|   |    |       |       |        |        |       |       |        |        |
|---|----|-------|-------|--------|--------|-------|-------|--------|--------|
| A | 26 | 0.235 | 0.131 | -0.398 | 0.052  | 0.308 | 0.238 | -0.549 | -0.030 |
| A | 29 | 0.211 | 0.128 | -0.364 | 0.024  | 0.220 | 0.155 | -0.369 | 0.015  |
| A | 31 | 0.233 | 0.156 | -0.360 | 0.0154 | 0.271 | 0.144 | -0.475 | 0.064  |
| A | 32 | 0.218 | 0.170 | -0.321 | 0.006  | 0.260 | 0.158 | -0.453 | 0.019  |
| A | 33 | 0.164 | 0.106 | -0.262 | 0.012  | 0.238 | 0.147 | -0.403 | 0.045  |
| A | 35 | 0.173 | 0.112 | -0.263 | 0.031  | 0.288 | 0.182 | -0.509 | 0.028  |
| A | 36 | 0.227 | 0.133 | -0.365 | 0.035  | 0.268 | 0.165 | -0.457 | 0.039  |
| A | 37 | 0.194 | 0.157 | -0.319 | -0.036 | 0.282 | 0.137 | -0.506 | 0.095  |
| A | 38 | 0.174 | 0.066 | -0.293 | 0.025  | 0.254 | 0.155 | -0.437 | 0.041  |
| A | 39 | 0.230 | 0.123 | -0.413 | 0.076  | 0.277 | 0.185 | -0.497 | 0.018  |
| A | 40 | 0.175 | 0.119 | -0.264 | 0.027  | 0.265 | 0.163 | -0.461 | 0.033  |
| A | 41 | 0.131 | 0.099 | -0.191 | 0.003  | 0.264 | 0.161 | -0.454 | 0.040  |
| A | 42 | 0.223 | 0.128 | -0.385 | 0.037  | 0.276 | 0.150 | -0.502 | 0.066  |
| A | 43 | 0.209 | 0.123 | -0.349 | 0.026  | 0.233 | 0.137 | -0.391 | 0.045  |
| A | 44 | 0.215 | 0.155 | -0.347 | 0.015  | 0.274 | 0.152 | -0.487 | 0.070  |
| A | 45 | 0.244 | 0.176 | -0.391 | 0.011  | 0.266 | 0.187 | -0.449 | 0.004  |
| A | 46 | 0.225 | 0.140 | -0.371 | 0.030  | 0.261 | 0.159 | -0.449 | 0.048  |
| A | 47 | 0.149 | 0.128 | -0.213 | -0.014 | 0.214 | 0.108 | -0.355 | 0.062  |
| A | 48 | 0.268 | 0.186 | -0.430 | -0.003 | 0.284 | 0.152 | -0.510 | 0.060  |
| A | 49 | 0.241 | 0.163 | -0.439 | 0.006  | 0.250 | 0.154 | -0.454 | 0.035  |
| A | 51 | 0.231 | 0.134 | -0.394 | 0.050  | 0.276 | 0.166 | -0.500 | 0.036  |
| A | 52 | 0.233 | 0.166 | -0.375 | 0.013  | 0.266 | 0.154 | -0.478 | 0.062  |
| A | 53 | 0.165 | 0.055 | -0.290 | 0.037  | 0.263 | 0.164 | -0.446 | 0.035  |
| A | 58 | 0.162 | 0.082 | -0.275 | 0.042  | 0.192 | 0.144 | -0.321 | 0.003  |
| A | 61 | 0.227 | 0.163 | -0.356 | 0.020  | 0.237 | 0.126 | -0.370 | 0.057  |
| A | 65 | 0.253 | 0.166 | -0.441 | 0.023  | 0.251 | 0.148 | -0.432 | 0.037  |
| A | 66 | 0.219 | 0.126 | -0.341 | 0.060  | 0.259 | 0.170 | -0.454 | 0.017  |
| A | 68 | 0.156 | 0.093 | -0.186 | 0.035  | 0.287 | 0.174 | -0.454 | 0.054  |
| A | 70 | 0.203 | 0.149 | -0.300 | 0.007  | 0.257 | 0.131 | -0.442 | 0.079  |
| A | 72 | 0.159 | 0.142 | -0.214 | 0.008  | 0.212 | 0.118 | -0.330 | 0.055  |
| A | 73 | 0.197 | 0.160 | -0.279 | -0.004 | 0.240 | 0.116 | -0.406 | 0.079  |
| A | 75 | 0.276 | 0.144 | -0.490 | 0.065  | 0.284 | 0.161 | -0.518 | 0.064  |
| A | 76 | 0.223 | 0.135 | -0.390 | 0.009  | 0.257 | 0.139 | -0.465 | 0.058  |
| A | 77 | 0.212 | 0.152 | -0.317 | 0.022  | 0.261 | 0.156 | -0.433 | 0.045  |
| A | 78 | 0.247 | 0.124 | -0.415 | 0.069  | 0.305 | 0.204 | -0.530 | 0.026  |
| A | 79 | 0.130 | 0.077 | -0.195 | 0.004  | 0.278 | 0.144 | -0.504 | 0.065  |
| A | 80 | 0.242 | 0.146 | -0.406 | 0.030  | 0.247 | 0.150 | -0.440 | 0.033  |
| A | 81 | 0.227 | 0.186 | -0.351 | -0.007 | 0.257 | 0.149 | -0.440 | 0.054  |
| A | 82 | 0.210 | 0.160 | -0.334 | 0.004  | 0.285 | 0.159 | -0.496 | 0.045  |
| A | 83 | 0.207 | 0.150 | -0.318 | 0.014  | 0.235 | 0.133 | -0.393 | 0.048  |
| A | 84 | 0.241 | 0.096 | -0.376 | 0.116  | 0.260 | 0.164 | -0.444 | 0.037  |
| A | 85 | 0.254 | 0.147 | -0.430 | 0.048  | 0.261 | 0.169 | -0.455 | 0.023  |
| A | 87 | 0.213 | 0.121 | -0.353 | 0.048  | 0.232 | 0.156 | -0.399 | 0.013  |
| A | 88 | 0.221 | 0.135 | -0.350 | 0.039  | 0.298 | 0.183 | -0.529 | 0.032  |
| A | 89 | 0.169 | 0.127 | -0.212 | 0.022  | 0.250 | 0.143 | -0.429 | 0.052  |
| A | 90 | 0.212 | 0.164 | -0.340 | 0.001  | 0.210 | 0.140 | -0.334 | 0.016  |

|   |     |       |       |        |        |       |       |        |       |
|---|-----|-------|-------|--------|--------|-------|-------|--------|-------|
| A | 93  | 0.275 | 0.163 | -0.467 | 0.034  | 0.299 | 0.159 | -0.527 | 0.062 |
| A | 94  | 0.209 | 0.123 | -0.344 | 0.035  | 0.294 | 0.181 | -0.544 | 0.029 |
| A | 96  | 0.181 | 0.145 | -0.248 | -0.001 | 0.297 | 0.167 | -0.536 | 0.063 |
| A | 98  | 0.234 | 0.064 | -0.474 | 0.001  | 0.280 | 0.163 | -0.507 | 0.037 |
| A | 100 | 0.181 | 0.125 | -0.286 | 0.010  | 0.208 | 0.145 | -0.328 | 0.030 |
| A | 103 | 0.215 | 0.122 | -0.342 | 0.049  | 0.289 | 0.159 | -0.520 | 0.061 |
| A | 104 | 0.211 | 0.132 | -0.342 | 0.038  | 0.218 | 0.143 | -0.343 | 0.023 |
| A | 105 | 0.240 | 0.161 | -0.391 | 0.037  | 0.277 | 0.189 | -0.482 | 0.024 |
| A | 108 | 0.186 | 0.097 | -0.260 | 0.050  | 0.290 | 0.200 | -0.478 | 0.026 |
| A | 109 | 0.239 | 0.126 | -0.403 | 0.055  | 0.318 | 0.174 | -0.556 | 0.049 |
| A | 110 | 0.213 | 0.126 | -0.351 | 0.046  | 0.300 | 0.167 | -0.540 | 0.060 |
| A | 111 | 0.237 | 0.196 | -0.401 | -0.030 | 0.266 | 0.127 | -0.482 | 0.083 |
| A | 112 | 0.210 | 0.138 | -0.344 | 0.026  | 0.263 | 0.154 | -0.473 | 0.042 |
| A | 113 | 0.248 | 0.151 | -0.432 | 0.050  | 0.329 | 0.167 | -0.629 | 0.063 |
| A | 114 | 0.179 | 0.096 | -0.275 | 0.036  | 0.299 | 0.199 | -0.527 | 0.010 |
| A | 115 | 0.189 | 0.124 | -0.288 | 0.041  | 0.212 | 0.158 | -0.340 | 0.020 |
| A | 117 | 0.237 | 0.160 | -0.386 | 0.014  | 0.254 | 0.159 | -0.433 | 0.038 |
| A | 124 | 0.248 | 0.184 | -0.437 | -0.005 | 0.284 | 0.191 | -0.524 | 0.033 |
| A | 125 | 0.163 | 0.073 | -0.248 | 0.028  | 0.226 | 0.148 | -0.359 | 0.040 |
| A | 126 | 0.230 | 0.161 | -0.375 | 0.013  | 0.230 | 0.142 | -0.373 | 0.039 |
| A | 127 | 0.210 | 0.140 | -0.315 | 0.025  | 0.231 | 0.155 | -0.381 | 0.014 |
| A | 129 | 0.206 | 0.150 | -0.347 | 0.001  | 0.255 | 0.144 | -0.459 | 0.056 |
| A | 130 | 0.186 | 0.125 | -0.303 | 0.021  | 0.248 | 0.145 | -0.434 | 0.045 |
| A | 131 | 0.196 | 0.087 | -0.319 | 0.034  | 0.312 | 0.163 | -0.549 | 0.072 |
| A | 132 | 0.242 | 0.156 | -0.420 | 0.032  | 0.307 | 0.169 | -0.579 | 0.052 |
| A | 134 | 0.227 | 0.150 | -0.381 | 0.024  | 0.268 | 0.156 | -0.469 | 0.053 |
| A | 136 | 0.252 | 0.133 | -0.450 | 0.033  | 0.267 | 0.175 | -0.484 | 0.017 |
| A | 137 | 0.230 | 0.164 | -0.371 | 0.011  | 0.246 | 0.150 | -0.413 | 0.046 |
| A | 139 | 0.204 | 0.110 | -0.308 | 0.054  | 0.244 | 0.176 | -0.416 | 0.001 |
| A | 140 | 0.244 | 0.101 | -0.410 | 0.098  | 0.301 | 0.195 | -0.530 | 0.030 |
| A | 146 | 0.204 | 0.147 | -0.355 | 0.003  | 0.258 | 0.142 | -0.432 | 0.071 |
| A | 147 | 0.250 | 0.162 | -0.423 | 0.019  | 0.273 | 0.166 | -0.488 | 0.040 |
| A | 148 | 0.280 | 0.157 | -0.498 | 0.054  | 0.311 | 0.181 | -0.560 | 0.055 |
| A | 150 | 0.258 | 0.168 | -0.451 | 0.020  | 0.262 | 0.161 | -0.453 | 0.038 |
| A | 152 | 0.229 | 0.109 | -0.393 | 0.073  | 0.309 | 0.198 | -0.560 | 0.015 |
| A | 153 | 0.221 | 0.140 | -0.412 | -0.045 | 0.293 | 0.137 | -0.539 | 0.102 |
| B | 1   | 0.184 | 0.142 | -0.264 | 0.016  | 0.248 | 0.126 | -0.406 | 0.082 |
| B | 2   | 0.269 | 0.167 | -0.488 | 0.033  | 0.269 | 0.179 | -0.474 | 0.014 |
| B | 3   | 0.263 | 0.106 | -0.502 | 0.060  | 0.346 | 0.184 | -0.672 | 0.066 |
| B | 5   | 0.150 | 0.091 | -0.223 | 0.025  | 0.249 | 0.153 | -0.424 | 0.030 |
| B | 6   | 0.227 | 0.141 | -0.409 | 0.011  | 0.300 | 0.165 | -0.573 | 0.055 |
| B | 7   | 0.273 | 0.154 | -0.467 | 0.053  | 0.286 | 0.168 | -0.518 | 0.035 |
| B | 8   | 0.236 | 0.120 | -0.408 | 0.072  | 0.240 | 0.132 | -0.417 | 0.069 |
| B | 10  | 0.293 | 0.184 | -0.515 | 0.026  | 0.310 | 0.161 | -0.581 | 0.063 |
| B | 11  | 0.206 | 0.085 | -0.346 | 0.079  | 0.279 | 0.193 | -0.499 | 0.002 |
| B | 12  | 0.226 | 0.146 | -0.392 | 0.026  | 0.271 | 0.138 | -0.501 | 0.082 |



|   |    |       |       |        |        |       |       |        |        |
|---|----|-------|-------|--------|--------|-------|-------|--------|--------|
| B | 13 | 0.271 | 0.152 | -0.473 | 0.052  | 0.263 | 0.157 | -0.480 | 0.013  |
| B | 17 | 0.197 | 0.126 | -0.290 | 0.030  | 0.261 | 0.173 | -0.443 | 0.034  |
| B | 18 | 0.240 | 0.163 | -0.384 | 0.013  | 0.242 | 0.129 | -0.403 | 0.064  |
| B | 19 | 0.206 | 0.079 | -0.376 | 0.058  | 0.289 | 0.175 | -0.550 | 0.021  |
| B | 20 | 0.167 | 0.053 | -0.261 | 0.068  | 0.225 | 0.174 | -0.380 | 0.002  |
| B | 22 | 0.227 | 0.155 | -0.365 | 0.026  | 0.245 | 0.154 | -0.430 | 0.043  |
| B | 24 | 0.204 | 0.168 | -0.312 | -0.021 | 0.249 | 0.111 | -0.420 | 0.096  |
| B | 27 | 0.212 | 0.105 | -0.363 | 0.051  | 0.265 | 0.179 | -0.445 | 0.015  |
| B | 28 | 0.191 | 0.156 | -0.326 | -0.003 | 0.288 | 0.179 | -0.517 | 0.027  |
| B | 30 | 0.201 | 0.087 | -0.343 | 0.059  | 0.236 | 0.176 | -0.415 | -0.007 |
| B | 31 | 0.181 | 0.130 | -0.285 | 0.008  | 0.259 | 0.151 | -0.463 | 0.049  |
| B | 32 | 0.191 | 0.151 | -0.261 | 0.017  | 0.241 | 0.130 | -0.393 | 0.062  |
| B | 34 | 0.153 | 0.102 | -0.236 | 0.015  | 0.259 | 0.155 | -0.459 | 0.041  |
| B | 36 | 0.189 | 0.143 | -0.282 | -0.010 | 0.340 | 0.156 | -0.606 | 0.086  |
| B | 37 | 0.259 | 0.153 | -0.466 | 0.057  | 0.276 | 0.142 | -0.520 | 0.080  |
| B | 39 | 0.227 | 0.132 | -0.410 | 0.024  | 0.253 | 0.148 | -0.471 | 0.037  |
| B | 41 | 0.208 | 0.118 | -0.340 | 0.004  | 0.256 | 0.160 | -0.449 | 0.027  |
| B | 43 | 0.192 | 0.072 | -0.332 | 0.066  | 0.215 | 0.174 | -0.356 | -0.009 |
| B | 44 | 0.198 | 0.135 | -0.298 | 0.029  | 0.257 | 0.170 | -0.434 | 0.0123 |
| B | 45 | 0.198 | 0.175 | -0.289 | -0.023 | 0.245 | 0.140 | -0.427 | 0.058  |
| B | 46 | 0.256 | 0.142 | -0.471 | 0.058  | 0.276 | 0.189 | -0.504 | -0.004 |
| B | 47 | 0.281 | 0.153 | -0.512 | 0.061  | 0.282 | 0.168 | -0.512 | 0.034  |
| B | 48 | 0.207 | 0.090 | -0.357 | 0.057  | 0.233 | 0.177 | -0.401 | -0.011 |
| B | 49 | 0.223 | 0.121 | -0.410 | 0.052  | 0.265 | 0.175 | -0.475 | 0.012  |
| B | 50 | 0.200 | 0.122 | -0.347 | 0.012  | 0.278 | 0.166 | -0.518 | 0.040  |
| B | 51 | 0.213 | 0.095 | -0.375 | 0.045  | 0.233 | 0.165 | -0.410 | 0.016  |
| B | 52 | 0.217 | 0.109 | -0.365 | 0.050  | 0.249 | 0.172 | -0.462 | 0.009  |
| B | 53 | 0.197 | 0.076 | -0.308 | 0.069  | 0.277 | 0.145 | -0.511 | 0.055  |
| B | 56 | 0.210 | 0.158 | -0.321 | 0.015  | 0.218 | 0.128 | -0.329 | 0.051  |
| B | 57 | 0.278 | 0.123 | -0.550 | 0.079  | 0.297 | 0.227 | -0.558 | -0.046 |
| B | 60 | 0.194 | 0.140 | -0.292 | 0.026  | 0.201 | 0.126 | -0.316 | 0.031  |
| B | 62 | 0.196 | 0.144 | -0.266 | 0.021  | 0.268 | 0.133 | -0.479 | 0.082  |
| B | 63 | 0.230 | 0.144 | -0.404 | 0.028  | 0.249 | 0.131 | -0.458 | 0.060  |
| B | 65 | 0.216 | 0.170 | -0.321 | -0.005 | 0.251 | 0.158 | -0.416 | 0.035  |
| B | 67 | 0.209 | 0.139 | -0.348 | 0.020  | 0.214 | 0.155 | -0.369 | 0.005  |
| B | 68 | 0.176 | 0.102 | -0.263 | 0.040  | 0.235 | 0.152 | -0.390 | 0.034  |
| B | 71 | 0.221 | 0.113 | -0.397 | 0.050  | 0.244 | 0.167 | -0.432 | 0.007  |
| B | 72 | 0.193 | 0.137 | -0.293 | 0.028  | 0.267 | 0.143 | -0.461 | 0.074  |
| B | 73 | 0.207 | 0.174 | -0.325 | -0.029 | 0.241 | 0.170 | -0.418 | -0.001 |
| B | 75 | 0.178 | 0.087 | -0.277 | 0.041  | 0.279 | 0.203 | -0.456 | -0.003 |
| B | 78 | 0.136 | 0.059 | -0.234 | 0.004  | 0.227 | 0.134 | -0.388 | 0.051  |
| B | 79 | 0.166 | 0.104 | -0.250 | 0.038  | 0.274 | 0.179 | -0.475 | 0.031  |
| B | 80 | 0.200 | 0.155 | -0.320 | 0.005  | 0.215 | 0.141 | -0.346 | 0.030  |
| B | 81 | 0.235 | 0.145 | -0.405 | 0.042  | 0.253 | 0.151 | -0.411 | 0.052  |
| B | 82 | 0.218 | 0.131 | -0.346 | 0.056  | 0.238 | 0.164 | -0.404 | 0.024  |
| B | 84 | 0.201 | 0.125 | -0.334 | 0.027  | 0.292 | 0.175 | -0.531 | 0.047  |

|   |     |       |       |        |        |       |       |        |        |
|---|-----|-------|-------|--------|--------|-------|-------|--------|--------|
| B | 85  | 0.207 | 0.166 | -0.325 | -0.000 | 0.227 | 0.110 | -0.375 | 0.063  |
| B | 86  | 0.216 | 0.087 | -0.390 | 0.065  | 0.287 | 0.178 | -0.540 | 0.028  |
| B | 87  | 0.270 | 0.175 | -0.484 | 0.027  | 0.301 | 0.161 | -0.544 | 0.060  |
| B | 89  | 0.250 | 0.169 | -0.406 | 0.024  | 0.270 | 0.151 | -0.473 | 0.065  |
| B | 90  | 0.160 | 0.084 | -0.224 | 0.035  | 0.238 | 0.150 | -0.398 | 0.057  |
| B | 91  | 0.209 | 0.098 | -0.350 | 0.064  | 0.271 | 0.157 | -0.490 | 0.047  |
| B | 92  | 0.182 | 0.190 | -0.264 | -0.060 | 0.296 | 0.167 | -0.510 | 0.061  |
| B | 93  | 0.261 | 0.124 | -0.483 | 0.079  | 0.314 | 0.184 | -0.582 | 0.043  |
| B | 94  | 0.213 | 0.112 | -0.348 | 0.056  | 0.256 | 0.183 | -0.452 | -0.007 |
| B | 95  | 0.263 | 0.127 | -0.464 | 0.075  | 0.299 | 0.221 | -0.534 | -0.017 |
| B | 96  | 0.246 | 0.158 | -0.400 | 0.020  | 0.254 | 0.194 | -0.402 | 0.017  |
| B | 97  | 0.283 | 0.156 | -0.520 | 0.047  | 0.287 | 0.199 | -0.513 | 0.025  |
| B | 98  | 0.170 | 0.123 | -0.258 | 0.016  | 0.244 | 0.115 | -0.411 | 0.084  |
| B | 99  | 0.217 | 0.087 | -0.380 | 0.062  | 0.258 | 0.173 | -0.440 | 0.030  |
| B | 100 | 0.213 | 0.133 | -0.339 | 0.030  | 0.223 | 0.131 | -0.360 | 0.048  |
| B | 101 | 0.269 | 0.173 | -0.476 | 0.044  | 0.326 | 0.194 | -0.626 | 0.0679 |
| B | 102 | 0.251 | 0.128 | -0.439 | 0.077  | 0.303 | 0.177 | -0.576 | 0.039  |
| B | 103 | 0.254 | 0.199 | -0.428 | -0.025 | 0.269 | 0.127 | -0.470 | 0.091  |
| B | 104 | 0.148 | 0.096 | -0.213 | 0.028  | 0.212 | 0.155 | -0.347 | 0.002  |
| B | 105 | 0.189 | 0.010 | -0.281 | 0.043  | 0.251 | 0.166 | -0.428 | 0.026  |
| B | 106 | 0.270 | 0.150 | -0.489 | 0.050  | 0.288 | 0.191 | -0.532 | 0.010  |
| B | 107 | 0.133 | 0.131 | -0.180 | -0.016 | 0.260 | 0.163 | -0.453 | 0.028  |
| B | 108 | 0.217 | 0.162 | -0.360 | 0.007  | 0.208 | 0.120 | -0.324 | 0.052  |
| B | 109 | 0.259 | 0.126 | -0.475 | 0.074  | 0.254 | 0.153 | -0.460 | 0.041  |
| B | 110 | 0.187 | 0.129 | -0.298 | 0.007  | 0.266 | 0.154 | -0.451 | 0.054  |
| B | 111 | 0.238 | 0.183 | -0.389 | -0.000 | 0.240 | 0.156 | -0.379 | 0.050  |
| B | 112 | 0.220 | 0.156 | -0.344 | 0.013  | 0.274 | 0.159 | -0.500 | 0.051  |
| B | 113 | 0.199 | 0.152 | -0.307 | -0.001 | 0.248 | 0.155 | -0.428 | 0.030  |
| B | 114 | 0.226 | 0.127 | -0.368 | 0.063  | 0.262 | 0.170 | -0.450 | 0.029  |
| B | 115 | 0.237 | 0.153 | -0.387 | 0.031  | 0.256 | 0.193 | -0.405 | 0.007  |
| B | 116 | 0.232 | 0.165 | -0.370 | 0.013  | 0.260 | 0.174 | -0.450 | 0.009  |
| B | 117 | 0.253 | 0.149 | -0.419 | 0.036  | 0.245 | 0.137 | -0.403 | 0.061  |
| B | 118 | 0.270 | 0.134 | -0.502 | 0.046  | 0.318 | 0.161 | -0.593 | 0.088  |
| B | 119 | 0.281 | 0.169 | -0.524 | 0.044  | 0.298 | 0.195 | -0.572 | 0.001  |
| B | 120 | 0.211 | 0.118 | -0.343 | 0.034  | 0.258 | 0.171 | -0.435 | 0.029  |
| B | 121 | 0.207 | 0.102 | -0.303 | 0.057  | 0.234 | 0.180 | -0.386 | 0.001  |
| B | 122 | 0.195 | 0.072 | -0.354 | 0.046  | 0.239 | 0.154 | -0.401 | 0.037  |
| B | 123 | 0.255 | 0.15  | -0.430 | 0.050  | 0.301 | 0.178 | -0.518 | 0.039  |
| B | 124 | 0.173 | 0.141 | -0.265 | 0.009  | 0.203 | 0.102 | -0.330 | 0.063  |
| B | 125 | 0.237 | 0.162 | -0.389 | 0.023  | 0.254 | 0.118 | -0.427 | 0.088  |
| B | 126 | 0.179 | 0.138 | -0.242 | 0.028  | 0.270 | 0.164 | -0.451 | 0.046  |
| B | 127 | 0.198 | 0.139 | -0.306 | 0.014  | 0.222 | 0.133 | -0.371 | 0.044  |
| B | 128 | 0.203 | 0.107 | -0.301 | 0.065  | 0.251 | 0.152 | -0.438 | 0.031  |
| B | 129 | 0.155 | 0.042 | -0.259 | 0.048  | 0.242 | 0.164 | -0.425 | 0.015  |
| B | 130 | 0.265 | 0.179 | -0.467 | 0.013  | 0.297 | 0.138 | -0.580 | 0.097  |
| B | 131 | 0.184 | 0.114 | -0.262 | 0.037  | 0.270 | 0.168 | -0.455 | 0.042  |

|   |     |       |       |        |        |       |       |        |        |
|---|-----|-------|-------|--------|--------|-------|-------|--------|--------|
| B | 132 | 0.185 | 0.147 | -0.274 | 0.011  | 0.214 | 0.111 | -0.352 | 0.044  |
| B | 133 | 0.201 | 0.152 | -0.298 | 0.010  | 0.267 | 0.143 | -0.454 | 0.074  |
| B | 134 | 0.227 | 0.163 | -0.352 | 0.020  | 0.239 | 0.113 | -0.405 | 0.082  |
| B | 135 | 0.185 | 0.126 | -0.273 | 0.030  | 0.243 | 0.148 | -0.402 | 0.041  |
| B | 136 | 0.233 | 0.108 | -0.390 | 0.082  | 0.282 | 0.179 | -0.488 | 0.033  |
| B | 137 | 0.206 | 0.106 | -0.335 | 0.038  | 0.240 | 0.183 | -0.413 | -0.012 |
| B | 138 | 0.201 | 0.157 | -0.298 | 0.007  | 0.234 | 0.138 | -0.391 | 0.046  |
| B | 139 | 0.245 | 0.189 | -0.438 | -0.014 | 0.250 | 0.080 | -0.499 | 0.082  |
| B | 140 | 0.289 | 0.185 | -0.490 | 0.030  | 0.288 | 0.147 | -0.530 | 0.069  |
| B | 141 | 0.187 | 0.100 | -0.302 | 0.031  | 0.245 | 0.122 | -0.410 | 0.087  |
| B | 142 | 0.224 | 0.123 | -0.371 | 0.034  | 0.296 | 0.193 | -0.516 | 0.031  |
| B | 143 | 0.139 | 0.125 | -0.183 | -0.009 | 0.215 | 0.135 | -0.324 | 0.037  |
| B | 144 | 0.175 | 0.216 | -0.283 | -0.080 | 0.325 | 0.165 | -0.580 | 0.052  |
| B | 145 | 0.193 | 0.172 | -0.300 | -0.025 | 0.279 | 0.136 | -0.498 | 0.085  |
| B | 146 | 0.150 | 0.149 | -0.194 | -0.003 | 0.208 | 0.150 | -0.330 | 0.021  |
| B | 147 | 0.182 | 0.094 | -0.303 | 0.027  | 0.291 | 0.193 | -0.531 | 0.019  |
| B | 148 | 0.186 | 0.158 | -0.282 | -0.011 | 0.261 | 0.140 | -0.446 | 0.056  |
| B | 149 | 0.239 | 0.181 | -0.383 | -0.006 | 0.242 | 0.135 | -0.403 | 0.050  |
| B | 150 | 0.197 | 0.145 | -0.319 | 0.020  | 0.252 | 0.174 | -0.433 | 0.014  |
| B | 151 | 0.276 | 0.209 | -0.480 | -0.012 | 0.270 | 0.137 | -0.490 | 0.037  |
| B | 152 | 0.197 | 0.158 | -0.270 | 0.005  | 0.242 | 0.156 | -0.390 | 0.037  |
| B | 153 | 0.190 | 0.077 | -0.322 | 0.043  | 0.305 | 0.167 | -0.564 | 0.050  |
| B | 154 | 0.127 | 0.101 | -0.206 | -0.008 | 0.239 | 0.150 | -0.419 | 0.031  |
| B | 155 | 0.157 | 0.081 | -0.276 | 0.030  | 0.290 | 0.198 | -0.535 | -0.002 |
| B | 156 | 0.153 | 0.125 | -0.198 | 0.006  | 0.236 | 0.163 | -0.393 | 0.035  |
| B | 157 | 0.176 | 0.087 | -0.268 | 0.049  | 0.241 | 0.188 | -0.403 | -0.011 |
| B | 158 | 0.160 | 0.137 | -0.242 | -0.006 | 0.178 | 0.085 | -0.277 | 0.052  |
| B | 159 | 0.211 | 0.063 | -0.387 | 0.062  | 0.284 | 0.194 | -0.525 | 0.010  |
| B | 160 | 0.245 | 0.142 | -0.431 | 0.046  | 0.259 | 0.166 | -0.452 | 0.026  |
| B | 161 | 0.202 | 0.110 | -0.325 | 0.041  | 0.234 | 0.174 | -0.395 | -0.002 |
| B | 162 | 0.183 | 0.055 | -0.307 | 0.068  | 0.228 | 0.162 | -0.388 | 0.016  |
| B | 163 | 0.201 | 0.136 | -0.319 | 0.004  | 0.192 | 0.110 | -0.266 | 0.068  |
| B | 164 | 0.181 | 0.131 | -0.250 | 0.019  | 0.221 | 0.142 | -0.339 | 0.042  |
| B | 165 | 0.256 | 0.158 | -0.448 | 0.042  | 0.278 | 0.185 | -0.498 | 0.023  |
| B | 166 | 0.161 | 0.161 | -0.231 | -0.017 | 0.254 | 0.142 | -0.424 | 0.064  |
| B | 167 | 0.167 | 0.117 | -0.232 | 0.009  | 0.213 | 0.119 | -0.330 | 0.052  |
| B | 168 | 0.212 | 0.077 | -0.367 | 0.056  | 0.280 | 0.182 | -0.459 | 0.066  |
| B | 169 | 0.177 | 0.136 | -0.262 | 0.012  | 0.209 | 0.142 | -0.352 | 0.026  |
| B | 170 | 0.138 | 0.074 | -0.214 | 0.020  | 0.251 | 0.145 | -0.410 | 0.061  |
| B | 171 | 0.120 | 0.044 | -0.183 | 0.029  | 0.197 | 0.135 | -0.312 | 0.035  |
| B | 172 | 0.213 | 0.145 | -0.352 | 0.021  | 0.237 | 0.138 | -0.391 | 0.047  |
| B | 173 | 0.177 | 0.115 | -0.253 | 0.034  | 0.321 | 0.194 | -0.575 | 0.032  |
| B | 174 | 0.131 | 0.114 | -0.226 | -0.014 | 0.249 | 0.144 | -0.436 | 0.039  |
| B | 175 | 0.199 | 0.122 | -0.292 | 0.042  | 0.211 | 0.124 | -0.336 | 0.052  |
| B | 176 | 0.159 | 0.157 | -0.232 | -0.016 | 0.202 | 0.093 | -0.327 | 0.078  |
| B | 177 | 0.188 | 0.158 | -0.254 | -0.004 | 0.315 | 0.161 | -0.580 | 0.080  |

---
