# Supplementary material
Source: MDPI journal article supplement (https://www.mdpi.com/2073-4395/11/11/2187)
Supplement: s1 [file s1]

Table S3. Mean of geometrical parameters ( $bi$ ) for each supposed wild population and variety from morphometric analysis of modern reference olive pits. These parameters were calculated using 20 landmarks per outline. A: dorsal view; B: lateral view.

| A                            |              |       |        |        |               |       |        |        |
|------------------------------|--------------|-------|--------|--------|---------------|-------|--------|--------|
| Population \ variety         | Left outline |       |        |        | Right outline |       |        |        |
|                              | b0           | b1    | b2     | b3     | b0            | b1    | b2     | b3     |
| <i>Wild</i>                  |              |       |        |        |               |       |        |        |
| Aradena (Greece)             | 0.196        | 0.147 | -0.308 | 0.026  | 0.221         | 0.119 | -0.380 | 0.043  |
| Atlit (Israel)               | 0.138        | 0.075 | -0.219 | 0.003  | 0.197         | 0.132 | -0.328 | -0.007 |
| Bucakkişle (Turkey)          | 0.227        | 0.142 | -0.406 | 0.017  | 0.301         | 0.189 | -0.564 | 0.042  |
| Cabo de San Antonio (Spain)  | 0.179        | 0.132 | -0.284 | 0.013  | 0.230         | 0.145 | -0.405 | 0.020  |
| Desfina (Greece)             | 0.186        | 0.141 | -0.284 | 0.000  | 0.283         | 0.176 | -0.502 | 0.044  |
| Dor (Israel)                 | 0.260        | 0.251 | -0.414 | -0.035 | 0.301         | 0.156 | -0.524 | 0.066  |
| Drasi (Grete)                | 0.241        | 0.132 | -0.417 | 0.046  | 0.280         | 0.167 | -0.504 | 0.042  |
| Ile-Rousse (Corsica)         | 0.191        | 0.141 | -0.319 | -0.002 | 0.254         | 0.144 | -0.458 | 0.046  |
| Jebel Zaghwan (Tunisia)      | 0.218        | 0.155 | -0.373 | 0.016  | 0.258         | 0.170 | -0.465 | 0.035  |
| Menzel Bourguiba (Tunisia)   | 0.190        | 0.131 | -0.319 | 0.022  | 0.242         | 0.146 | -0.416 | 0.042  |
| Mesmouda (Morocco)           | 0.197        | 0.133 | -0.316 | 0.012  | 0.265         | 0.160 | -0.462 | 0.029  |
| Moulay Bouazza (Morocco)     | 0.233        | 0.116 | -0.426 | 0.055  | 0.317         | 0.199 | -0.579 | 0.041  |
| Nahal Oren (Israel)          | 0.196        | 0.127 | -0.303 | 0.036  | 0.223         | 0.144 | -0.362 | 0.030  |
| Pylos (Greece)               | 0.204        | 0.135 | -0.344 | 0.026  | 0.295         | 0.178 | -0.546 | 0.043  |
| Slunfeh (Syria)              | 0.266        | 0.168 | -0.473 | 0.032  | 0.301         | 0.176 | -0.545 | 0.049  |
| Tlata Taghram (Morocco)      | 0.233        | 0.122 | -0.376 | 0.061  | 0.270         | 0.166 | -0.467 | 0.041  |
| Viggianello (Corsica)        | 0.173        | 0.135 | -0.263 | 0.015  | 0.264         | 0.158 | -0.484 | 0.036  |
| <i>Variety</i>               |              |       |        |        |               |       |        |        |
| Abou Chawkeh (Lebanon)       | 0.149        | 0.111 | -0.245 | 0.002  | 0.209         | 0.131 | -0.369 | 0.018  |
| Aglandau (France)            | 0.223        | 0.158 | -0.379 | 0.002  | 0.239         | 0.138 | -0.419 | 0.048  |
| Alethrico (Cyprus)           | 0.230        | 0.123 | -0.416 | 0.019  | 0.283         | 0.160 | -0.518 | 0.050  |
| Amfissa (Greece)             | 0.198        | 0.122 | -0.337 | 0.030  | 0.238         | 0.155 | -0.419 | 0.022  |
| Arbequina (Spain)            | 0.260        | 0.160 | -0.444 | 0.037  | 0.284         | 0.163 | -0.501 | 0.040  |
| Athalassa (Cyprus)           | 0.191        | 0.136 | -0.328 | 0.010  | 0.246         | 0.147 | -0.436 | 0.029  |
| Bella Dispagna (Italy)       | 0.154        | 0.092 | -0.250 | 0.012  | 0.200         | 0.137 | -0.337 | 0.016  |
| Besbessi (Tunisia)           | 0.202        | 0.065 | -0.368 | 0.036  | 0.250         | 0.179 | -0.444 | 0.013  |
| Bouchouk (Morocco)           | 0.139        | 0.142 | -0.200 | 0.003  | 0.208         | 0.134 | -0.383 | -0.003 |
| Cailletier (France)          | 0.212        | 0.113 | -0.360 | 0.056  | 0.252         | 0.162 | -0.446 | 0.008  |
| Carasquenha (Spain)          | 0.171        | 0.099 | -0.297 | 0.017  | 0.242         | 0.154 | -0.433 | 0.022  |
| Carolia (Greece)             | 0.189        | 0.131 | -0.295 | 0.006  | 0.207         | 0.130 | -0.340 | 0.036  |
| Cayet rouge (France)         | 0.195        | 0.143 | -0.314 | 0.023  | 0.240         | 0.132 | -0.413 | 0.031  |
| Cayon (France)               | 0.168        | 0.099 | -0.273 | 0.019  | 0.224         | 0.142 | -0.394 | 0.028  |
| Chemlali Chouamekh (Tunisia) | 0.164        | 0.126 | -0.251 | 0.010  | 0.232         | 0.137 | -0.403 | 0.020  |
| Chondrolia (Crete)           | 0.153        | 0.115 | -0.223 | 0.011  | 0.208         | 0.140 | -0.352 | 0.017  |
| Corniale (France)            | 0.143        | 0.101 | -0.216 | 0.011  | 0.195         | 0.117 | -0.302 | 0.027  |
| Crastu (Sicily)              | 0.205        | 0.147 | -0.334 | 0.013  | 0.257         | 0.154 | -0.448 | 0.032  |
| Cypressino (Italy)           | 0.233        | 0.154 | -0.392 | 0.028  | 0.252         | 0.157 | -0.433 | 0.035  |
| Djlot Shami (Syria)          | 0.127        | 0.130 | -0.147 | 0.002  | 0.253         | 0.143 | -0.432 | 0.039  |
| Drobnica (Croatia)           | 0.185        | 0.167 | -0.310 | 0.012  | 0.276         | 0.135 | -0.516 | 0.015  |
| Ecijano (Spain)              | 0.154        | 0.105 | -0.229 | 0.007  | 0.243         | 0.162 | -0.436 | 0.020  |
| Gaidouriola (Greece)         | 0.142        | 0.096 | -0.235 | 0.007  | 0.191         | 0.131 | -0.329 | 0.012  |
| Grappola (Italy)             | 0.174        | 0.115 | -0.263 | 0.010  | 0.238         | 0.145 | -0.402 | 0.035  |
| Grossane (France)            | 0.206        | 0.124 | -0.338 | 0.045  | 0.240         | 0.166 | -0.420 | 0.001  |

|                               |       |       |        |        |       |       |        |        |
|-------------------------------|-------|-------|--------|--------|-------|-------|--------|--------|
| Hamrani (Morocco)             | 0.206 | 0.160 | -0.361 | 0.005  | 0.230 | 0.136 | -0.408 | 0.023  |
| Istambuli (Syria/Turkey)      | 0.164 | 0.095 | -0.260 | 0.031  | 0.255 | 0.152 | -0.452 | 0.033  |
| Jlott Baladi (Syria)          | 0.110 | 0.088 | -0.151 | 0.003  | 0.207 | 0.145 | -0.355 | 0.019  |
| Kalamata (Greece)             | 0.173 | 0.112 | -0.267 | 0.039  | 0.215 | 0.151 | -0.360 | -0.001 |
| Koroneiki (Greece)            | 0.177 | 0.107 | -0.294 | 0.022  | 0.229 | 0.146 | -0.410 | 0.030  |
| Kortbi (Morocco)              | 0.188 | 0.110 | -0.292 | 0.032  | 0.216 | 0.164 | -0.346 | 0.014  |
| Lastovka (Croatia)            | 0.182 | 0.010 | -0.282 | 0.052  | 0.237 | 0.167 | -0.392 | 0.009  |
| Leccino (Italy)               | 0.148 | 0.106 | -0.233 | 0.020  | 0.230 | 0.149 | -0.396 | 0.016  |
| Lefkara (Cyprus)              | 0.181 | 0.113 | -0.306 | 0.010  | 0.232 | 0.136 | -0.420 | 0.022  |
| Lentisca (Portugal)           | 0.190 | 0.141 | -0.298 | 0.017  | 0.279 | 0.169 | -0.488 | 0.027  |
| Manaki (Greece)               | 0.167 | 0.121 | -0.280 | 0.008  | 0.231 | 0.148 | -0.423 | 0.016  |
| Manzanilla (Spain)            | 0.208 | 0.143 | -0.341 | 0.024  | 0.258 | 0.165 | -0.457 | 0.019  |
| Mavrolia (Greece)             | 0.174 | 0.127 | -0.255 | 0.023  | 0.241 | 0.149 | -0.421 | 0.036  |
| Megaritiko (Greece)           | 0.151 | 0.069 | -0.206 | 0.050  | 0.201 | 0.085 | -0.317 | 0.019  |
| Meski (Tunisia)               | 0.187 | 0.135 | -0.299 | 0.013  | 0.223 | 0.150 | -0.378 | 0.034  |
| Meslala (Morocco)             | 0.202 | 0.120 | -0.371 | 0.029  | 0.254 | 0.153 | -0.468 | 0.009  |
| Mišnica (Slovenia)            | 0.268 | 0.209 | -0.454 | -0.004 | 0.318 | 0.118 | -0.558 | 0.095  |
| Olivière (France)             | 0.139 | 0.008 | -0.251 | 0.034  | 0.208 | 0.186 | -0.372 | -0.011 |
| Picholine Marocaine (Morocco) | 0.167 | 0.107 | -0.271 | 0.005  | 0.220 | 0.150 | -0.371 | 0.024  |
| Picual (Spain)                | 0.171 | 0.107 | -0.282 | 0.018  | 0.201 | 0.126 | -0.319 | 0.025  |
| Psilolia (Crete)              | 0.178 | 0.140 | -0.276 | 0.002  | 0.237 | 0.151 | -0.414 | 0.026  |
| Rkhami (Tunisia)              | 0.156 | 0.141 | -0.217 | 0.024  | 0.273 | 0.178 | -0.467 | 0.007  |
| Semlal (Morocco)              | 0.141 | 0.067 | -0.179 | 0.058  | 0.266 | 0.077 | -0.408 | 0.050  |
| Sourani (Syria)               | 0.161 | 0.117 | -0.252 | 0.022  | 0.214 | 0.122 | -0.379 | 0.033  |
| Souri (Israel)                | 0.153 | 0.091 | -0.247 | 0.016  | 0.226 | 0.134 | -0.407 | 0.027  |
| Tanche (France)               | 0.232 | 0.151 | -0.411 | 0.019  | 0.290 | 0.155 | -0.551 | 0.032  |
| Tefahi (Syria)                | 0.262 | 0.162 | -0.441 | 0.032  | 0.303 | 0.176 | -0.531 | 0.036  |
| Verdale de l'Hérault (France) | 0.207 | 0.128 | -0.332 | 0.042  | 0.238 | 0.149 | -0.409 | 0.036  |
| Verdiel (Spain)               | 0.153 | 0.107 | -0.259 | 0.012  | 0.214 | 0.134 | -0.386 | 0.019  |
| Zaity (Syria)                 | 0.240 | 0.148 | -0.404 | 0.036  | 0.277 | 0.163 | -0.486 | 0.044  |

| B                           |                       |       |        |        |                       |       |        |       |
|-----------------------------|-----------------------|-------|--------|--------|-----------------------|-------|--------|-------|
| Population \ variety        | Sterile valve outline |       |        |        | Fertile valve outline |       |        |       |
|                             | b0                    | b1    | b2     | b3     | b0                    | b1    | b2     | b3    |
| <i>Wild</i>                 |                       |       |        |        |                       |       |        |       |
| Aradena (Greece)            | 0.180                 | 0.089 | -0.294 | 0.049  | 0.236                 | 0.178 | -0.398 | 0.018 |
| Atlit (Israel)              | 0.186                 | 0.126 | -0.310 | 0.036  | 0.231                 | 0.140 | -0.405 | 0.045 |
| Bucakkişle (Turkey)         | 0.240                 | 0.138 | -0.442 | 0.025  | 0.282                 | 0.169 | -0.521 | 0.057 |
| Cabo de San Antonio (Spain) | 0.150                 | 0.059 | -0.266 | 0.016  | 0.216                 | 0.159 | -0.382 | 0.020 |
| Desfina (Greece)            | 0.217                 | 0.173 | -0.362 | -0.007 | 0.248                 | 0.133 | -0.428 | 0.058 |
| Dor (Israel)                | 0.246                 | 0.100 | -0.393 | 0.084  | 0.296                 | 0.202 | -0.522 | 0.023 |
| Drasi (Grete)               | 0.235                 | 0.147 | -0.408 | 0.027  | 0.288                 | 0.175 | -0.519 | 0.034 |
| Ile-Rousse (Corsica)        | 0.194                 | 0.160 | -0.334 | -0.026 | 0.230                 | 0.102 | -0.405 | 0.080 |
| Jebel Zaghwan (Tunisia)     | 0.211                 | 0.134 | -0.371 | 0.016  | 0.265                 | 0.162 | -0.467 | 0.055 |
| Menzel Bourguiba (Tunisia)  | 0.188                 | 0.118 | -0.325 | -0.001 | 0.232                 | 0.139 | -0.387 | 0.051 |
| Mesmouda (Morocco)          | 0.184                 | 0.108 | -0.312 | 0.014  | 0.269                 | 0.180 | -0.453 | 0.043 |
| Moulay Bouazza (Morocco)    | 0.258                 | 0.131 | -0.453 | 0.039  | 0.300                 | 0.209 | -0.525 | 0.035 |
| Nahal Oren (Israel)         | 0.170                 | 0.100 | -0.260 | 0.024  | 0.237                 | 0.140 | -0.408 | 0.050 |
| Pylos (Greece)              | 0.228                 | 0.127 | -0.412 | 0.038  | 0.261                 | 0.188 | -0.460 | 0.030 |
| Slunfeh (Syria)             | 0.259                 | 0.142 | -0.479 | 0.054  | 0.304                 | 0.181 | -0.555 | 0.048 |
| Tlata Taghram (Morocco)     | 0.197                 | 0.121 | -0.314 | 0.027  | 0.283                 | 0.165 | -0.497 | 0.048 |

|                                  |       |        |        |        |       |        |        |        |
|----------------------------------|-------|--------|--------|--------|-------|--------|--------|--------|
| Vigbianello (Corsica)            | 0.187 | 0.105  | -0.326 | 0.032  | 0.225 | 0.160  | -0.390 | 0.017  |
| <i>Variety</i>                   |       |        |        |        |       |        |        |        |
| Abou Chawkeh (Lebanon)           | 0.107 | 0.025  | -0.182 | 0.028  | 0.206 | 0.147  | -0.367 | 0.004  |
| Aglandau (France)                | 0.137 | 0.069  | -0.237 | 0.005  | 0.267 | 0.131  | -0.480 | 0.080  |
| Alethrico (Cyprus)               | 0.196 | 0.083  | -0.391 | -0.050 | 0.294 | 0.120  | -0.529 | 0.124  |
| Amfissa (Greece)                 | 0.183 | 0.106  | -0.306 | 0.021  | 0.240 | 0.140  | -0.420 | 0.041  |
| Arbequina (Spain)                | 0.233 | 0.121  | -0.401 | 0.045  | 0.288 | 0.172  | -0.516 | 0.046  |
| Athalassa (Cyprus)               | 0.172 | 0.025  | -0.306 | 0.069  | 0.245 | 0.191  | -0.424 | -0.005 |
| Bella Dispagna (Italy)           | 0.131 | 0.062  | -0.208 | 0.012  | 0.206 | 0.135  | -0.331 | 0.0310 |
| Besbessi (Tunisia)               | 0.186 | 0.061  | -0.337 | 0.028  | 0.266 | 0.161  | -0.466 | 0.050  |
| Bouchouk (Morocco)               | 0.118 | 0.034  | -0.226 | -0.001 | 0.215 | 0.137  | -0.376 | 0.042  |
| Caillietier (France)             | 0.190 | 0.074  | -0.357 | -0.013 | 0.237 | 0.149  | -0.422 | 0.064  |
| Carasquenha (Spain)              | 0.149 | 0.062  | -0.272 | -0.008 | 0.237 | 0.124  | -0.430 | 0.059  |
| Carolia (Greece)                 | 0.113 | 0.051  | -0.171 | 0.010  | 0.257 | 0.146  | -0.442 | 0.064  |
| Cayet rouge (France)             | 0.175 | 0.048  | -0.303 | 0.037  | 0.235 | 0.167  | -0.405 | 0.020  |
| Cayon (France)                   | 0.121 | 0.032  | -0.232 | -0.003 | 0.243 | 0.133  | -0.440 | 0.059  |
| Chemlali Chouamekh<br>(Tunisia)  | 0.165 | 0.070  | -0.296 | 0.010  | 0.224 | 0.165  | -0.383 | 0.023  |
| Chondrolia (Crete)               | 0.139 | 0.097  | -0.223 | -0.013 | 0.206 | 0.114  | -0.345 | 0.049  |
| Corniale (France)                | 0.074 | 0.003  | -0.104 | 0.039  | 0.210 | 0.142  | -0.342 | 0.008  |
| Crastu (Sicily)                  | 0.181 | 0.078  | -0.306 | 0.037  | 0.261 | 0.156  | -0.458 | 0.030  |
| Cypressino (Italy)               | 0.174 | 0.062  | -0.301 | 0.024  | 0.271 | 0.170  | -0.484 | 0.033  |
| Djlot Shami (Syria)              | 0.148 | 0.083  | -0.201 | 0.021  | 0.204 | 0.145  | -0.306 | 0.028  |
| Drobnica (Croatia)               | 0.147 | 0.006  | -0.306 | 0.015  | 0.275 | 0.162  | -0.496 | 0.069  |
| Ecijano (Spain)                  | 0.123 | 0.062  | -0.201 | -0.009 | 0.240 | 0.152  | -0.409 | 0.041  |
| Gaidouriola (Greece)             | 0.094 | 0.080  | -0.132 | -0.017 | 0.190 | 0.096  | -0.321 | 0.053  |
| Grappola (Italy)                 | 0.167 | 0.091  | -0.271 | 0.000  | 0.238 | 0.150  | -0.391 | 0.044  |
| Grossane (France)                | 0.154 | 0.124  | -0.245 | -0.012 | 0.257 | 0.136  | -0.460 | 0.059  |
| Hamrani (Morocco)                | 0.123 | -0.013 | -0.254 | 0.030  | 0.284 | 0.177  | -0.514 | 0.051  |
| Istambuli (Syria/Turkey)         | 0.151 | 0.027  | -0.276 | 0.046  | 0.235 | 0.152  | -0.415 | 0.007  |
| Jlott Baladi (Syria)             | 0.081 | -0.003 | -0.139 | 0.012  | 0.208 | 0.121  | -0.349 | 0.057  |
| Kalamata (Greece)                | 0.128 | 0.061  | -0.223 | -0.015 | 0.238 | 0.129  | -0.398 | 0.069  |
| Koroneiki (Greece)               | 0.171 | 0.092  | -0.306 | 0.010  | 0.237 | 0.135  | -0.434 | 0.038  |
| Kortbi (Morocco)                 | 0.139 | 0.067  | -0.208 | 0.007  | 0.248 | 0.138  | -0.410 | 0.076  |
| Lastovka (Croatia)               | 0.171 | 0.130  | -0.256 | -0.001 | 0.224 | 0.112  | -0.375 | 0.060  |
| Leccino (Italy)                  | 0.150 | 0.069  | -0.250 | 0.009  | 0.222 | 0.134  | -0.390 | 0.050  |
| Lefkara (Cyprus)                 | 0.159 | 0.031  | -0.287 | 0.041  | 0.241 | 0.172  | -0.419 | 0.009  |
| Lentisca (Portugal)              | 0.170 | 0.096  | -0.278 | 0.020  | 0.276 | 0.141  | -0.505 | 0.050  |
| Manaki (Greece)                  | 0.160 | 0.086  | -0.291 | -0.028 | 0.226 | 0.094  | -0.39  | 0.082  |
| Manzanilla (Spain)               | 0.160 | 0.117  | -0.269 | -0.026 | 0.274 | 0.129  | -0.495 | 0.084  |
| Mavrolia (Greece)                | 0.171 | 0.117  | -0.281 | 0.013  | 0.221 | 0.131  | -0.376 | 0.033  |
| Megaritiko (Greece)              | 0.156 | 0.131  | -0.237 | -0.024 | 0.206 | 0.079  | -0.353 | 0.079  |
| Meski (Tunisia)                  | 0.148 | 0.094  | -0.230 | 0.008  | 0.220 | 0.1223 | -0.372 | 0.051  |
| Meslala (Morocco)                | 0.162 | 0.041  | -0.327 | -0.019 | 0.255 | 0.154  | -0.463 | 0.070  |
| Mišnica (Slovenia)               | 0.230 | 0.085  | -0.413 | 0.052  | 0.296 | 0.174  | -0.519 | 0.054  |
| Olivière (France)                | 0.133 | -0.003 | -0.252 | 0.045  | 0.226 | 0.186  | -0.405 | -0.012 |
| Picholine Marocaine<br>(Morocco) | 0.111 | -0.019 | -0.217 | 0.031  | 0.263 | 0.159  | -0.474 | 0.041  |
| Picual (Spain)                   | 0.123 | 0.026  | -0.200 | 0.032  | 0.253 | 0.167  | -0.348 | 0.059  |
| Psilolia (Crete)                 | 0.164 | 0.065  | -0.300 | 0.018  | 0.244 | 0.149  | -0.435 | 0.037  |
| Rkhami (Tunisia)                 | 0.126 | 0.031  | -0.237 | 0.008  | 0.234 | 0.139  | -0.404 | 0.051  |

|                               |       |       |        |        |       |       |        |       |
|-------------------------------|-------|-------|--------|--------|-------|-------|--------|-------|
| Semlal (Morocco)              | 0.161 | 0.124 | -0.258 | -0.021 | 0.208 | 0.090 | -0.346 | 0.082 |
| Sourani (Syria)               | 0.131 | 0.019 | -0.228 | 0.037  | 0.221 | 0.140 | -0.377 | 0.031 |
| Souri (Israel)                | 0.151 | 0.056 | -0.252 | 0.035  | 0.218 | 0.133 | -0.374 | 0.039 |
| Tanche (France)               | 0.223 | 0.070 | -0.415 | 0.042  | 0.270 | 0.187 | -0.478 | 0.029 |
| Tefahi (Syria)                | 0.196 | 0.067 | -0.338 | 0.054  | 0.302 | 0.197 | -0.536 | 0.014 |
| Verdale de l'Hérault (France) | 0.189 | 0.167 | -0.295 | -0.024 | 0.257 | 0.105 | -0.446 | 0.089 |
| Verdiel (Spain)               | 0.126 | 0.026 | -0.262 | 0.009  | 0.229 | 0.145 | -0.410 | 0.042 |
| Zaity (Syria)                 | 0.188 | 0.112 | -0.326 | 0.003  | 0.269 | 0.146 | -0.493 | 0.046 |

---
